# Supplementary material for: Sex difference in the association between triglyceride and intracerebral bleeding risk after intravenous thrombolysis for acute ischemic stroke, a multi-center retrospective study
Source: PeerJ. 2024 Jun 24;12:e17558. doi: 10.7717/peerj.17558 (PMC11210480; doi:10.7717/peerj.17558)
Supplement: Supplemental Information 2 [file peerj-12-17558-s002.xlsx]

## Sheet: raw data
sICH(1=yes 0 =no)	Age(years)	Sex（0=women，1=men）	Smoker（0=no，1=yes）	Drinker（0=no，1=yes）	Previous stroke（0=no，1=yes）	HBP （0=no，1=yes）	DM（0=no，1=yes）	Hyperlipidemia（0=no，1=yes）	CHF（0=no，1=yes）	Ischmecheartdisease（0=no，1=yes）	AF（0=no，1=yes）	Previous antithrombotic (1=antiplatelet，2=OAC）	Pre-stroke antiHBP（0=no，1=yes）	Prestorke statin（0=no，1=yes）	TOAST (0=SVO 1=CE 2=LAAO 3 =other or underdetermined)	IntialNIHSSscore	SBP(mmHg)	PLT(100-300)	CHOL(3.40-6.10)mmol/L	TG(0.40-1.86)mmol/L	LDL(1.10-3.50)mmol/L	Baseline Blood glucose mmol/L	TGimputed	TotalCholestolImputed	LDLimputed	Blood glucose imputed	SBPimputed	TGtertileimputed	TertileTotalCholesImputed	TertielLDLimputed	Thrombectomy (1=yes 0 =no)
0	61	1	1	0	0	1	0	0	0	0	0	0	0	0	2	8	154	269	5.28	1.43	3.42	8.08	1.43	5.28	3.42	8.08	154	2	3	2	0
0	53	1	1	0	0	0	0	0	0	0	0	0	0	0	2	7	130	121	3.03	0.72	2.31	5.93	0.72	3.03	2.31	5.93	130	1	1	1	0
0	63	1	0	0	0	1	0	0	0	0	1	0	0	0	2	12	169	181	2.89	0.8	2.04	6.73	0.8	2.89	2.04	6.73	169	1	1	1	0
0	49	0	0	0	0	1	0	0	0	0	1	0	0	0	1	12	198	198	5.17	0.77	3.37	5.98	0.77	5.17	3.37	5.98	198	1	3	2	0
0	73	1	1	0	0	1	0	1	0	0	1	0	0	0	1	20	180	156	3.56	4.82	2.65	7.2	4.82	3.56	2.65	7.2	180	3	1	2	0
0	27	0	0	0	0	0	0	0	0	0	0	0	0	0	3	19	132	245	4.12	0.26	2.63	6.36	0.26	4.12	2.63	6.36	132	1	1	2	0
1	59	1	0	0	0	1	0	0	0	0	0	0	1	0	2	27	154	179	4.86	1.11	3.25	8	1.11	4.86	3.25	8	154	2	2	2	1
1	68	1	0	0	1	1	1	0	0	0	0	0	1	0	2	22	240	162	3.78	0.66	2.34	12	0.66	3.78	2.34	12	240	1	1	1	0
0	64	1	1	0	0	0	0	1	0	0	0	0	0	0	2	12	145	203	4.72	2.54	3.07	7	2.54	4.72	3.07	7	145	3	2	2	0
0	68	0	0	0	0	1	0	1	0	0	1	0	1	0	1	16	145	249	5.76	0.85	4.01	7	0.85	5.76	4.01	7	145	1	3	3	0
0	46	0	0	0	0	0	0	0	0	0	0	0	0	0	3	5	154	221	5	0.7	3.53	6.35	0.7	5	3.53	6.35	154	1	3	3	0
0	71	1	0	0	0	1	0	0	0	0	1	0	1	0	3	10	140	162	3.27	1.08	2.42	5.49	1.08	3.27	2.42	5.49	140	2	1	1	0
0	78	0	0	0	0	0	0	0	0	0	1	0	0	0	1	10	145	133	4.72	1.23	2.37	5.49	1.23	4.72	2.37	5.49	145	2	2	1	0
0	75	1	1	0	0	1	1	0	0	0	0	1	1	0	2	13	196	178	5.99	1.01	4	14.15	1.01	5.99	4	14.15	196	1	3	3	0
0	56	0	0	0	0	0	0	0	0	0	1	0	0	0	1	7	115	144	3.45	0.38	2.02	6.61	0.38	3.45	2.02	6.61	115	1	1	1	0
0	69	1	0	0	1	1	0	0	0	0	0	0	1	0	2	2	135	259	2.64	0.69	1.62	4.52	0.69	2.64	1.62	4.52	135	1	1	1	0
0	66	1	1	0	0	0	0	0	0	0	1	0	0	0	1	4	140	170	4.23	0.54	2.75	7.17	0.54	4.23	2.75	7.17	140	1	2	2	0
0	75	1	0	0	0	1	0	0	0	0	1	1	1	0	1	17	130	96	6.01	1.49	4.02	6.84	1.49	6.01	4.02	6.84	130	2	3	3	0
0	73	0	0	0	0	1	0	0	0	0	1	0	1	0	1	10	154	198	3.9	1.21	2.9	5.96	1.21	3.9	2.9	5.96	154	2	1	2	0
0	61	0	0	0	0	0	0	0	0	0	0	0	0	0	0	5	132	126	5.53	1.1	3.3	5.7	1.1	5.53	3.3	5.7	132	2	3	2	0
0	76	1	0	0	1	1	1	1	0	0	0	0	1	0	2	2	130	144	4.82	1.49	3.55	9.78	1.49	4.82	3.55	9.78	130	2	2	3	0
0	57	1	1	0	0	0	1	1	0	0	0	0	0	0	2	8	126	151	5.2	2.95	3.71	8.69	2.95	5.2	3.71	8.69	126	3	3	3	0
0	74	1	0	0	0	1	0	0	1	1	1	0	1	0	1	14	134	122	3.87	0.9	2.59	5.94	0.9	3.87	2.59	5.94	134	1	1	2	0
0	69	1	1	0	0	1	0	0	1	0	1	0	1	0	1	16	126	120	4.66	1.02	3.36	5.95	1.02	4.66	3.36	5.95	126	2	2	2	0
1	68	0	0	0	0	1	1	1	1	1	1	0	0	0	1	12	152	152	6.16	1.29	3.85	9.66	1.29	6.16	3.85	9.66	152	2	3	3	0
0	62	1	0	0	0	1	0	0	0	1	0	0	0	0	3	12	126	156	4.9	0.24	2.99	8.02	0.24	4.9	2.99	8.02	126	1	2	2	0
0	74	0	0	0	0	1	0	0	0	0	0	0	0	0	2	9	126	200	3.67	0.56	2.39	4.45	0.56	3.67	2.39	4.45	126	1	1	1	0
0	31	1	1	0	0	0	0	1	0	0	0	0	0	0	3	12	120	132	5.21	1.36	3.66	5.87	1.36	5.21	3.66	5.87	120	2	3	3	0
0	68	1	0	0	0	1	1	0	0	0	0	0	1	0	3	8	135	157	2.95	0.61	1.65	11.27	0.61	2.95	1.65	11.27	135	1	1	1	0
0	50	0	0	0	0	0	0	1	0	0	0	0	0	0	0	12	121	179	5.62	1.03	3.61	5.97	1.03	5.62	3.61	5.97	121	2	3	3	0
0	65	1	0	0	1	1	0	0	0	0	1	1	0	0	1	4	120	250	3.8	0.72	2.17	6.69	0.72	3.8	2.17	6.69	120	1	1	1	0
0	58	1	0	0	0	0	0	0	0	0	1	0	0	0	1	24	160	235	4.86	1.01	2.9	8.23	1.01	4.86	2.9	8.23	160	1	2	2	0
1	67	1	0	0	0	0	1	1	0	0	1	0	0	0	1	19	135	155	6.04	1.12	4.34	17.31	1.12	6.04	4.34	17.31	135	2	3	3	0
0	71	0	0	0	0	0	0	0	1	0	1	0	0	0	1	24	120	202	4.8	7.38	2.74	19.2	7.38	4.8	2.74	19.2	120	3	2	2	0
0	67	0	0	0	0	1	1	1	0	0	0	0	0	0	2	7	155	169	6.37	2.22	4.69	11.09	2.22	6.37	4.69	11.09	155	3	3	3	0
0	75	1	1	0	0	0	0	0	0	0	0	0	0	0	0	7	120	218	4.48	1.35	3.07	5.9	1.35	4.48	3.07	5.9	120	2	2	2	0
0	68	1	1	0	0	1	0	0	0	1	0	1	1	0	1	12	167	133	3.98	0.94	2.62	7.28	0.94	3.98	2.62	7.28	167	1	1	2	0
0	63	1	0	1	0	1	0	1	0	0	0	0	1	0	0	1	158	238	5.44	1.06	4.13	7.54	1.06	5.44	4.13	7.54	158	2	3	3	0
1	68	1	0	0	0	1	1	0	1	1	1	0	0	0	1	7	139	223	4.32	0.68	3.14	10.25	0.68	4.32	3.14	10.25	139	1	2	2	0
0	57	0	0	0	0	1	0	1	0	0	0	0	1	0	2	12	140	215	3.72	0.83	3.72	5.51	0.83	3.72	3.72	5.51	140	1	1	3	0
0	62	1	1	0	0	0	0	0	0	0	0	0	0	0	2	18	124	202	4.45	0.98	3.02	7.13	0.98	4.45	3.02	7.13	124	1	2	2	0
0	68	1	0	0	0	1	1	0	0	0	0	0	1	0	2	4	180	132	5.19	1.42	4	9.25	1.42	5.19	4	9.25	180	2	3	3	0
0	78	0	1	0	0	1	0	0	1	0	1	0	1	0	2	10	145	254	4.79	1.03	3.4	6.43	1.03	4.79	3.4	6.43	145	2	2	2	0
1	79	0	0	0	0	1	0	1	0	0	1	0	0	0	1	8	180	255	5.95	3.84	4.37	4.34	3.84	5.95	4.37	4.34	180	3	3	3	0
0	60	1	1	0	0	1	1	0	0	0	0	0	0	0	2	3	180	240	3.32	1.14	1.89	5.66	1.14	3.32	1.89	5.66	180	2	1	1	0
0	60	1	0	0	0	1	1	1	1	0	0	0	1	0	0	3	179	248	6.3	1.9	4.45	8.5	1.9	6.3	4.45	8.5	179	3	3	3	0
0	66	1	1	1	0	1	0	0	0	0	1	0	0	0	1	2	180	161	4	0.92	2.33	5.72	0.92	4	2.33	5.72	180	1	1	1	0
0	57	1	1	1	0	0	0	1	0	0	0	0	0	0	0	3	148	246	6.62	1.73	4.84	6.56	1.73	6.62	4.84	6.56	148	3	3	3	0
0	61	1	0	0	0	1	0	0	0	1	0	1	1	1	2	11	175	203	4.36	1.22	2.13	8.53	1.22	4.36	2.13	8.53	175	2	2	1	0
0	81	0	0	0	0	1	1	1	0	0	0	0	1	0	3	2	159	192	5.07	0.8	3.62	11.18	0.8	5.07	3.62	11.18	159	1	3	3	0
0	69	1	0	0	0	1	0	1	0	0	1	1	1	0	1	8	192	171	4.98	1.12	0.92	6.55	1.12	4.98	0.92	6.55	192	2	3	1	0
0	79	1	0	0	0	1	0	0	1	0	0	0	1	0	2	1	169	136	4.57	0.78	3.03	5.34	0.78	4.57	3.03	5.34	169	1	2	2	0
0	57	1	1	1	0	1	0	0	0	0	0	0	0	0	3	7	152	209	4.33	1.25	3.01	5.34	1.25	4.33	3.01	5.34	152	2	2	2	0
0	49	0	0	0	0	0	0	0	0	0	0	0	0	0	1	6	136	219	3.82	1.08	2.15	5.71	1.08	3.82	2.15	5.71	136	2	1	1	0
0	86	1	0	0	0	1	0	0	0	0	1	0	1	0	1	7	184	214	4.48	0.97	2.99	5.55	0.97	4.48	2.99	5.55	184	1	2	2	0
0	70	1	0	0	0	1	1	0	0	0	1	0	1	0	2	9	150	190	3.95	1.47	2.81	10.6	1.47	3.95	2.81	10.6	150	2	1	2	0
1	83	1	0	0	0	1	1	0	0	1	1	1	1	1	1	19	154	137	2.59	0.48	1.18	10.45	0.48	2.59	1.18	10.45	154	1	1	1	0
0	78	0	0	0	0	1	0	1	0	0	1	0	1	0	1	1	149	191	5.65	1.32	4.33	2.37814	1.32	5.65	4.33	8.31	149	2	3	3	0
0	83	1	1	0	0	1	1	0	0	0	1	0	1	0	1	18	175	105	3.21	0.89	1.83	7.27	0.89	3.21	1.83	7.27	175	1	1	1	0
0	65	1	0	0	0	1	0	1	0	0	1	0	0	0	0	8	158	174	5.64	1.62	4.08	7.16	1.62	5.64	4.08	7.16	158	3	3	3	0
1	72	0	0	0	0	1	0	0	0	0	1	2	1	0	1	14	118	169	5.12	1.77	3.04	6.45	1.77	5.12	3.04	6.45	118	3	3	2	0
0	72	0	0	0	0	1	0	0	0	1	0	0	1	1	3	4	174	170	3.79	1.01	2.25	7.88	1.01	3.79	2.25	7.88	174	1	1	1	0
0	72	1	1	0	0	1	0	0	0	0	0	0	1	0	2	5	131	252	3.37	1.44	2.4	7.26	1.44	3.37	2.4	7.26	131	2	1	1	0
0	73	0	0	0	0	0	0	1	1	0	1	0	0	0	1	10	129	100	5.99	0.7	4.13	6.08	0.7	5.99	4.13	6.08	129	1	3	3	0
0	69	0	0	0	0	1	0	1	0	0	1	0	1	0	1	11	174	200	6.16	3.85	10	8.99	3.85	6.16	10	8.99	174	3	3	3	0
0	76	1	1	0	0	1	0	0	0	0	0	0	0	0	3	4	152	228	3.52	1.32	3.84	7.05	1.32	3.52	3.84	7.05	152	2	1	3	0
0	67	1	0	0	0	0	1	1	0	0	0	0	0	0	2	5	165	222	4.13	0.94	4.18	19.8	0.94	4.13	4.18	19.8	165	1	2	3	0
0	50	0	0	0	0	1	0	0	0	0	0	0	1	0	3	0	153	226	4.18	1.37	2.72	6.02	1.37	4.18	2.72	6.02	153	2	2	2	0
0	35	1	0	0	0	0	0	0	1	0	0	0	1	0	1	10	100	177	3.48	0.95	1.8	5.72	0.95	3.48	1.8	5.72	100	1	1	1	0
0	77	1	0	0	0	1	0	0	0	0	1	0	1	0	2	5	138	124	3.80582	0.481869	1.91222	4.01	1.66	4.54	2.53	4.01	138	3	2	1	0
0	74	1	0	0	1	1	1	0	1	1	0	0	1	0	3	15	170	155	4.14	1.8	2.78	12.99	1.8	4.14	2.78	12.99	170	3	2	2	0
0	39	1	0	1	0	0	0	1	1	0	1	0	0	0	1	8	124	216	4.99	2.46	3.87	18.76	2.46	4.99	3.87	18.76	124	3	3	3	0
0	62	0	0	0	0	1	0	0	0	0	0	0	0	0	0	3	127	268	3.65	0.94	2	6.58	0.94	3.65	2	6.58	127	1	1	1	0
0	69	0	0	0	0	1	0	1	0	0	0	0	1	0	2	3	150	249	5.52	1.65	3.65	6.04	1.65	5.52	3.65	6.04	150	3	3	3	0
0	78	1	1	1	0	1	0	0	0	0	1	0	1	0	1	12	164	161	4.01	0.76	2.15	5.15	0.76	4.01	2.15	5.15	164	1	1	1	0
0	63	1	0	0	0	1	0	1	0	0	0	0	1	0	3	8	132	180	5.75	0.91	3.89	6.34	0.91	5.75	3.89	6.34	132	1	3	3	0
0	79	1	0	0	0	1	1	0	1	0	1	0	1	0	1	6	118	204	3.08	1.32	1.52	9.62	1.32	3.08	1.52	9.62	118	2	1	1	0
0	68	0	0	0	0	1	0	1	0	0	1	0	0	0	2	10	160	167	3.38	1	1.86	5.97	1	3.38	1.86	5.97	160	1	1	1	0
0	76	1	1	0	0	1	0	0	0	0	0	1	1	0	2	14	178	162	3.4	1.46	2	6.32	1.46	3.4	2	6.32	178	2	1	1	0
0	69	0	0	0	0	1	0	0	0	1	1	0	1	0	1	12	151	257	5.87	1.13	3.85	7.64	1.13	5.87	3.85	7.64	151	2	3	3	0
0	74	0	1	0	0	1	0	0	0	0	1	0	1	0	1	16	145	345	4.8	0.78	3.18	6.25	0.78	4.8	3.18	6.25	145	1	2	2	0
0	82	1	0	0	1	1	0	1	0	0	1	0	0	0	3	6	126	144	6.99	1.68	5.3	7.98	1.68	6.99	5.3	7.98	126	3	3	3	0
0	74	1	0	0	1	1	1	1	0	0	1	0	0	0	1	16	128	307	5.46	2	3.89	6.66	2	5.46	3.89	6.66	128	3	3	3	0
0	46	0	0	0	0	0	0	0	0	0	0	0	0	0	1	0	130	190	4.82	0.89	2.94	6.72	0.89	4.82	2.94	6.72	130	1	2	2	0
0	58	1	0	0	0	1	1	0	0	0	0	0	1	0	2	1	142	172	3.57	1	1.96	6.72	1	3.57	1.96	6.72	142	1	1	1	0
0	71	1	1	0	0	1	0	0	1	1	0	1	1	0	2	11	165	203	4.6	0.93	2.74	5.41	0.93	4.6	2.74	5.41	165	1	2	2	0
1	76	1	1	0	0	0	0	0	0	0	1	0	0	0	1	8	131	155	5.11	0.88	3.11	4.64	0.88	5.11	3.11	4.64	131	1	3	2	0
0	77	0	0	0	0	1	0	0	1	0	1	0	1	0	1	6	165	227	4.56	0.86	2.4	7.98	0.86	4.56	2.4	7.98	165	1	2	1	0
0	63	1	1	0	0	0	0	0	0	0	0	0	0	0	2	4	120	136	4.56	0.83	2.3	5.1595	0.83	4.56	2.3	7.5	120	1	2	1	0
0	84	0	0	0	0	0	1	0	0	0	0	0	0	0	3	25	125	139	3.89	1.2	1.72	5.77	1.2	3.89	1.72	5.77	125	2	1	1	0
0	65	0	0	0	0	1	0	0	0	0	0	0	1	0	3	4	135	174	3.95	1.07	2.06	6.77	1.07	3.95	2.06	6.77	135	2	1	1	0
0	50	1	0	0	0	1	0	1	0	0	0	0	0	0	2	16	112	188	9.07	0.65	6.23	6.29	0.65	9.07	6.23	6.29	112	1	3	3	0
0	58	1	0	0	0	0	0	1	0	0	0	0	0	0	3	1	137	223	6.29	1.03	4.43	5.49	1.03	6.29	4.43	5.49	137	2	3	3	0
0	67	1	1	1	1	1	0	0	0	0	0	1	0	0	2	15	150	200	4.15	1.75	2.41	5.22	1.75	4.15	2.41	5.22	150	3	2	1	0
0	53	1	0	0	0	1	0	1	0	0	0	0	0	0	0	27	144	178	6.26	3.61	4.46	4.79	3.61	6.26	4.46	4.79	144	3	3	3	0
0	62	1	1	1	0	1	0	1	1	0	0	0	0	0	3	5	138	167	4.45	2.05	3.11	5.35	2.05	4.45	3.11	5.35	138	3	2	2	0
0	62	1	0	0	0	0	0	1	0	0	0	0	0	0	3	1	122	178	3.39	2.31	1.8	5.87	2.31	3.39	1.8	5.87	122	3	1	1	0
0	60	1	1	1	0	0	0	1	0	0	0	0	0	0	2	3	153	342	5.51	2.26	3.87	5.12	2.26	5.51	3.87	5.12	153	3	3	3	0
0	75	0	0	0	0	1	0	1	0	0	0	0	0	0	2	1	190	259	6.32	1.09	4.37	9.96	1.09	6.32	4.37	9.96	190	2	3	3	0
0	57	1	1	0	1	1	0	0	0	0	0	0	1	0	0	11	126	122	2.71	1.04	1.58	5.63	1.04	2.71	1.58	5.63	126	2	1	1	0
0	65	0	0	0	0	1	1	0	0	0	0	0	0	0	0	3	105	231	2.21	0.77	1.02	11.03	0.77	2.21	1.02	11.03	105	1	1	1	0
0	61	1	1	0	0	1	0	0	0	0	0	0	1	0	2	22	149	184	4.04	0.98	2.58	6.23	0.98	4.04	2.58	6.23	149	1	1	1	0
0	56	0	0	0	0	0	0	0	0	0	0	2	0	0	2	20	110	112	3.36	0.59	2.08	6.32	0.59	3.36	2.08	6.32	110	1	1	1	0
0	74	1	0	0	0	0	0	0	0	1	0	0	0	0	0	2	112	135	4.03	1.29	2.73	5.95	1.29	4.03	2.73	5.95	112	2	1	2	0
0	51	1	1	1	1	0	0	0	0	0	0	0	0	0	2	11	130	235	3.07	1.33	1.93	5.18	1.33	3.07	1.93	5.18	130	2	1	1	0
0	60	0	0	0	0	1	0	1	0	0	0	0	1	0	1	4	119	204	5.39	1.95	3.73	7.82	1.95	5.39	3.73	7.82	119	3	3	3	0
1	76	1	1	1	0	1	0	1	0	0	1	0	0	0	1	17	161	130	5.27	0.72	3.67	6.48	0.72	5.27	3.67	6.48	161	1	3	3	0
0	73	0	0	0	0	1	0	0	0	0	1	2	1	0	1	1	141	151	4.69	1.35	3.32	7.13	1.35	4.69	3.32	7.13	141	2	2	2	0
0	63	1	0	0	0	1	1	0	0	0	0	0	1	0	2	11	129	150	4.16	1.21	3.23	18.2	1.21	4.16	3.23	18.2	129	2	2	2	0
0	53	1	1	0	0	1	0	1	0	0	0	0	0	0	2	12	191	120	5.33	0.57	3.59	7.14	0.57	5.33	3.59	7.14	191	1	3	3	0
0	82	1	0	0	1	1	0	0	0	0	1	0	0	0	1	2	151	193	3.66	1.28	2.43	6.51	1.28	3.66	2.43	6.51	151	2	1	1	0
0	75	0	0	0	0	0	0	0	0	0	0	1	0	1	3	6	163	202	4.66	0.8	3.33	6.29	0.8	4.66	3.33	6.29	163	1	2	2	0
0	77	1	0	0	0	1	0	0	0	0	0	0	0	0	0	7	139	131	3.68	1.53	2.07	5.34	1.53	3.68	2.07	5.34	139	2	1	1	0
0	81	1	0	1	0	0	0	0	1	0	0	0	0	0	0	4	148	172	3.98	1.04	3.15	5.7	1.04	3.98	3.15	5.7	148	2	1	2	0
0	76	0	0	0	1	1	0	0	0	0	0	0	1	0	3	2	147	127	3.87	1.09	2.4	7.32	1.09	3.87	2.4	7.32	147	2	1	1	0
0	82	1	0	0	1	1	1	0	1	1	1	1	0	1	1	4	158	184	2.79	0.92	1.78	6.19	0.92	2.79	1.78	6.19	158	1	1	1	0
0	72	1	0	1	0	1	0	1	1	1	1	0	1	0	1	9	138	147	4.96	0.9	3.54	5.47	0.9	4.96	3.54	5.47	138	1	2	3	0
0	84	0	0	0	0	0	0	0	1	0	0	0	0	0	3	8	130	170	4.09	1.55	2.52	7.64	1.55	4.09	2.52	7.64	130	3	1	1	0
0	69	1	0	0	1	0	0	0	0	0	1	0	0	0	1	11	164	180	3.67	0.43	1.75	4.9	0.43	3.67	1.75	4.9	164	1	1	1	0
0	72	1	0	1	0	1	1	0	0	0	0	0	1	0	3	3	142	157	2.27	1.35	0.92	10.98	1.35	2.27	0.92	10.98	142	2	1	1	0
0	76	1	0	0	0	1	1	1	0	0	0	0	1	0	0	2	176	189	4.16	1.92	2.85	8.33	1.92	4.16	2.85	8.33	176	3	2	2	0
0	53	0	0	0	0	1	0	1	0	0	0	0	0	0	3	1	151	345	6.27	0.49	3.97	6.6	0.49	6.27	3.97	6.6	151	1	3	3	0
0	45	0	0	0	0	1	0	0	1	0	0	0	0	0	0	1	168	274	3.54171	1.5111	1.63097	6.16	2	5.24	3.95	6.16	168	3	3	3	0
0	62	1	0	0	0	0	0	1	1	1	0	0	0	0	1	4	138	180	5.12	1.15	3.58	7.3	1.15	5.12	3.58	7.3	138	2	3	3	0
0	74	1	0	0	1	1	0	1	0	0	0	0	1	0	0	3	160	328	4.92	1.23	3.34	4.31	1.23	4.92	3.34	4.31	160	2	2	2	0
0	68	1	0	0	0	1	1	1	0	0	1	0	1	0	2	2	132	215	3.43	1.9	2.51	14.49	1.9	3.43	2.51	14.49	132	3	1	1	0
0	69	0	0	0	0	1	1	1	0	0	1	0	1	0	1	3	141	213	2.57	1.28	1.52	11.85	1.28	2.57	1.52	11.85	141	2	1	1	0
0	53	0	0	0	0	1	0	0	0	0	0	0	1	0	3	0	167	237	4.01	1.51	2.93	6.13	1.51	4.01	2.93	6.13	167	2	1	2	0
0	72	1	0	0	0	1	1	0	0	0	0	0	1	0	3	4	162	140	3.52	1.07	2.82	14.36	1.07	3.52	2.82	14.36	162	2	1	2	0
0	77	0	0	0	0	1	0	0	0	0	1	0	0	0	3	15	125	180	2.97	0.68	1.81	7.15	0.68	2.97	1.81	7.15	125	1	1	1	0
0	45	1	0	0	0	1	0	0	1	0	0	0	0	0	1	10	160	298	5.53	0.67	3.9	6.23	0.67	5.53	3.9	6.23	160	1	3	3	0
0	60	1	0	0	0	0	1	0	0	0	1	1	0	1	1	6	112	190	4.88	2.97	3.49	9.56	2.97	4.88	3.49	9.56	112	3	2	3	0
0	76	1	1	0	0	0	0	1	0	1	0	0	0	0	2	2	140	175	3.5	2.31	2.31	6.01	2.31	3.5	2.31	6.01	140	3	1	1	0
0	85	1	0	0	1	0	0	0	0	0	0	0	0	0	2	5	138	174	3.56	0.82	2.1	7.19	0.82	3.56	2.1	7.19	138	1	1	1	0
0	64	0	0	0	0	0	0	0	1	0	1	0	0	0	1	10	110	130	4.04	1.37	2.9	7.66	1.37	4.04	2.9	7.66	110	2	1	2	0
0	69	0	0	0	0	1	1	1	0	1	1	1	1	1	1	12	156	259	5.17	2.16	3.41	12.42	2.16	5.17	3.41	12.42	156	3	3	2	1
0	59	0	0	0	0	1	0	1	1	0	0	0	0	0	0	14	180	267	5.9	1.05	4.61	13.74	1.05	5.9	4.61	13.74	180	2	3	3	0
0	77	1	0	0	0	1	1	0	0	1	0	0	1	0	2	3	160	133	4.3	1.09	3.12	7.75	1.09	4.3	3.12	7.75	160	2	2	2	0
1	73	0	0	0	1	1	0	0	0	0	1	0	1	0	1	10	189	302	5.32	0.65	3.97	9.03	0.65	5.32	3.97	9.03	189	1	3	3	0
0	62	0	0	0	0	0	0	0	0	0	1	0	0	0	1	5	130	141	4.76	1.28	3.51	7.11	1.28	4.76	3.51	7.11	130	2	2	3	0
0	53	0	0	0	0	1	1	0	1	1	0	1	1	0	3	8	128	217	3.2	1.01	1.88	8.46	1.01	3.2	1.88	8.46	128	1	1	1	0
0	63	1	0	0	1	1	1	0	1	0	0	0	1	0	2	7	135	483	1.53	1.17	0.35	11.2	1.17	1.53	0.35	11.2	135	2	1	1	0
0	48	1	0	0	1	1	0	0	0	1	1	1	1	0	1	4	137	203	4.85264	1.25666	2.64488	5.69	2.52	4.39	2.27	5.69	137	3	2	1	0
0	77	1	0	0	0	0	0	0	0	1	0	1	0	0	2	5	128	150	2.58	1	1.27	5.98	1	2.58	1.27	5.98	128	1	1	1	0
0	54	0	0	0	1	1	0	0	0	1	0	1	1	0	3	4	168	172	4.48	1.97	2.72	7.23	1.97	4.48	2.72	7.23	168	3	2	2	0
0	82	1	0	0	0	1	1	0	1	0	1	0	1	0	1	8	157	166	2.73	0.59	1.7	18.53	0.59	2.73	1.7	18.53	157	1	1	1	1
0	66	1	0	0	0	0	0	0	0	0	0	0	0	0	2	1	145	169	4.52	1.03	3.47	8.47	1.03	4.52	3.47	8.47	145	2	2	3	0
0	71	1	1	1	0	1	0	0	0	0	0	0	0	0	2	6	130	157	4.7	1.16	2.25	10.13	1.16	4.7	2.25	10.13	130	2	2	1	0
0	59	0	0	0	0	0	0	0	0	0	0	0	0	0	3	17	131	306	5.5228	3.02334	2.56122	6.75	2.47	4.55	2.58	6.75	131	3	2	1	1
1	82	0	0	0	0	1	0	1	1	1	1	0	0	0	1	16	140	184	7.9	3.84	9.6	7.23	3.84	7.9	9.6	7.23	140	3	3	3	1
0	71	1	1	0	0	1	0	0	1	0	0	0	1	0	2	13	158	242	4.2	0.8	3.2	4.92	0.8	4.2	3.2	4.92	158	1	2	2	0
0	76	1	0	0	1	1	1	0	1	0	1	0	0	0	1	14	122	201	3.18	0.9	1.86	6.06	0.9	3.18	1.86	6.06	122	1	1	1	0
0	52	0	0	0	0	0	0	1	0	0	0	0	0	0	2	2	134	224	5.24	0.44	3.72	6.39	0.44	5.24	3.72	6.39	134	1	3	3	0
0	76	0	0	0	0	0	0	0	0	0	0	0	0	0	1	9	130	152	4.61	1.33	3.07	5.66	1.33	4.61	3.07	5.66	130	2	2	2	0
0	54	1	1	0	0	1	1	1	0	0	0	0	0	0	0	2	181	222	6.98	4.28	4.74	21.47	4.28	6.98	4.74	21.47	181	3	3	3	0
0	80	1	0	0	0	1	0	0	1	1	1	1	0	1	1	10	140	105	2.78	1.07	1.51	6.4	1.07	2.78	1.51	6.4	140	2	1	1	1
0	54	1	1	0	0	0	0	0	0	0	0	0	0	0	2	11	104	291	4.07	0.7	2.16	4.39	0.7	4.07	2.16	4.39	104	1	1	1	1
0	65	1	1	0	0	1	0	0	0	0	0	0	1	0	0	5	135	182	2.77	1.33	1.56	5.72	1.33	2.77	1.56	5.72	135	2	1	1	0
0	48	1	0	0	0	1	0	1	0	0	0	0	1	0	0	1	130	258	2.36	4.65	2.36	8.83135	4.65	2.36	2.36	8.37	130	3	1	1	0
0	69	1	1	1	0	0	0	1	0	0	0	0	0	0	0	2	139	173	4.41	4.32	2.5	6.1	4.32	4.41	2.5	6.1	139	3	2	1	0
0	45	0	0	0	1	0	0	1	0	0	0	1	0	1	2	2	125	276	4.89	0.97	3.58	7.48	0.97	4.89	3.58	7.48	125	1	2	3	0
0	46	1	1	0	0	1	0	0	0	0	0	0	0	0	2	21	138	208	3.3	1.16	2.17	10.55	1.16	3.3	2.17	10.55	138	2	1	1	0
0	62	1	0	0	0	1	0	1	1	0	1	1	1	0	1	4	141	219	3.33	2.18	1.87	11.1603	2.18	3.33	1.87	5.9	141	3	1	1	0
0	55	1	0	0	0	0	0	1	0	0	0	0	0	0	3	12	115	219	4.23	2.21	2.6	7.49	2.21	4.23	2.6	7.49	115	3	2	2	0
0	66	1	1	0	1	1	1	0	0	0	1	2	1	0	1	6	130	120	3.95	1	2.38	5.18	1	3.95	2.38	5.18	130	1	1	1	0
0	78	1	0	0	0	0	0	0	0	0	0	0	0	0	3	8	148	219	2.63	0.93	1.01	5.91	0.93	2.63	1.01	5.91	148	1	1	1	0
0	65	1	0	0	0	1	1	0	0	1	0	1	1	0	2	5	154	230	3.13	0.72	1.97	10.5	0.72	3.13	1.97	10.5	154	1	1	1	0
0	59	1	0	0	1	0	0	0	0	0	0	1	1	1	3	2	110	211	3.16	1.28	1.9	6.51	1.28	3.16	1.9	6.51	110	2	1	1	0
1	59	0	0	0	0	0	0	0	0	0	1	0	0	0	1	21	120	246	3.57	1.07	2.39	12.71	1.07	3.57	2.39	12.71	120	2	1	1	1
0	61	1	0	0	0	1	0	0	0	0	0	0	1	0	2	1	150	226	3.48	1.66	2.16	9.48	1.66	3.48	2.16	9.48	150	3	1	1	0
0	72	0	0	0	0	0	0	0	0	0	0	0	0	0	2	11	180	225	3.67	0.95	2.14	6.41	0.95	3.67	2.14	6.41	180	1	1	1	1
0	42	1	1	1	0	1	0	0	0	0	1	2	0	0	1	6	150	198	6.67756	0.999214	2.39094	6.48	1.54	4.57	3.1	6.48	150	2	2	2	0
0	81	0	0	0	0	1	1	1	0	0	0	0	1	0	2	0	152	164	5.4	2.05	3.77	6.31	2.05	5.4	3.77	6.31	152	3	3	3	0
0	73	0	0	0	0	1	0	1	0	0	1	2	1	0	1	4	141	141	5.21	1.39	3.52	6.53	1.39	5.21	3.52	6.53	141	2	3	3	0
0	61	1	1	0	0	1	0	0	0	0	0	0	0	0	2	13	163	206	3.52	1.5	2.36	4.89	1.5	3.52	2.36	4.89	163	2	1	1	1
0	46	0	0	0	0	0	1	0	0	0	0	0	0	0	3	6	126	399	3.7	0.85	2.2	8.73	0.85	3.7	2.2	8.73	126	1	1	1	0
0	79	0	0	0	0	1	1	0	0	0	1	0	1	0	1	20	166	163	4.26197	0.338248	3.02105	16.95	1.11	4.66	3.5	16.95	166	2	2	3	0
0	72	1	0	0	0	1	0	0	1	0	0	1	1	1	2	4	186	521	4.54	0.89	2.72	6.79	0.89	4.54	2.72	6.79	186	1	2	2	0
0	85	1	1	1	0	1	0	0	0	0	0	0	1	0	2	2	141	221	4.69	0.59	3.02	8.39	0.59	4.69	3.02	8.39	141	1	2	2	0
0	72	1	0	0	1	1	0	1	0	0	0	1	1	0	2	3	144	194	4.18	5.28	1.71	6.29	5.28	4.18	1.71	6.29	144	3	2	1	0
0	58	0	0	0	0	0	0	1	0	0	1	0	0	0	1	1	150	280	5.49	1.37	3.84	7.53	1.37	5.49	3.84	7.53	150	2	3	3	0
0	68	1	1	0	0	1	0	1	0	0	0	0	1	0	0	5	154	318	5.19	0.79	3.74	5.57	0.79	5.19	3.74	5.57	154	1	3	3	0
0	62	1	1	0	0	0	0	0	0	0	1	1	0	0	1	5	120	198	4.93	1.16	3.23	8.19	1.16	4.93	3.23	8.19	120	2	2	2	1
0	39	1	0	0	0	0	0	1	1	0	1	0	0	0	1	1	117	209	6.32	2.35	4.66	7.36	2.35	6.32	4.66	7.36	117	3	3	3	0
1	87	0	0	0	0	1	0	0	0	0	0	0	1	0	0	6	182	283	4.57	1.75	3.14	5.65	1.75	4.57	3.14	5.65	182	3	2	2	0
0	65	1	0	0	0	1	1	1	1	0	0	0	1	1	0	3	146	192	5.07	1.78	3.57	12.83	1.78	5.07	3.57	12.83	146	3	3	3	0
1	67	1	1	0	0	1	0	0	0	0	1	0	1	0	1	21	175	153	4.95	0.65	3.14	5.91	0.65	4.95	3.14	5.91	175	1	2	2	0
0	54	1	1	0	0	1	0	1	0	0	0	0	0	0	2	9	145	258	5.55	2.15	4.2	6.2	2.15	5.55	4.2	6.2	145	3	3	3	0
0	62	1	1	0	1	1	0	0	1	1	0	1	1	0	2	1	134	267	4.31	1.49	2.77	6.75	1.49	4.31	2.77	6.75	134	2	2	2	0
1	81	0	0	0	0	1	1	0	1	1	1	0	1	0	1	7	216	272	3.78	0.96	2.45	9.36	0.96	3.78	2.45	9.36	216	1	1	1	0
0	60	1	0	0	1	1	0	0	0	0	0	0	1	0	2	2	138	161	2.62	1.78	1.35	8.76	1.78	2.62	1.35	8.76	138	3	1	1	0
0	55	1	1	0	0	1	0	0	1	1	1	1	1	0	1	4	175	203	5.57	1.22	3.47	5.62	1.22	5.57	3.47	5.62	175	2	3	3	0
0	67	0	0	0	0	0	0	0	0	0	0	0	0	0	0	13	136	185	4.03	0.87	2.73	7.9	0.87	4.03	2.73	7.9	136	1	1	2	0
0	58	0	0	0	0	0	0	1	0	0	0	0	0	0	2	16	123	235	5.22	1.86	3.75	8.84	1.86	5.22	3.75	8.84	123	3	3	3	1
0	58	0	0	0	0	1	0	0	0	0	1	0	1	0	1	2	140	252	4.24	1.41	2.99	6.13	1.41	4.24	2.99	6.13	140	2	2	2	0
0	76	1	0	0	0	0	0	0	0	0	1	1	0	0	2	7	142	109	4.45	0.82	2.76	5.73	0.82	4.45	2.76	5.73	142	1	2	2	1
1	67	0	0	0	0	1	1	0	1	1	1	1	1	0	1	25	140	265	2.88	0.99	1.64	12.71	0.99	2.88	1.64	12.71	140	1	1	1	1
0	74	0	0	0	0	0	1	0	0	1	1	0	0	0	1	21	145	178	2.62	0.62	1.4	8.18	0.62	2.62	1.4	8.18	145	1	1	1	1
0	76	1	1	0	0	1	0	0	1	1	0	0	0	0	2	4	167	188	6.43	1.83	5.28	8.5	1.83	6.43	5.28	8.5	167	3	3	3	0
0	78	1	1	0	0	1	0	0	0	1	1	1	1	1	1	12	170	135	4.25	1.07	2.5	7.16	1.07	4.25	2.5	7.16	170	2	2	1	0
0	63	1	1	0	0	0	0	0	0	0	0	0	0	0	0	5	184	304	3.31	0.77	1.75	5.16	0.77	3.31	1.75	5.16	184	1	1	1	0
0	60	0	0	0	0	0	0	1	1	0	1	0	0	0	1	2	110	271	4.66	1.03	3.6	6.35	1.03	4.66	3.6	6.35	110	2	2	3	0
0	39	1	1	0	0	1	0	0	0	0	0	0	0	0	0	8	157	301	4.73	1.51	3.08	7.05	1.51	4.73	3.08	7.05	157	2	2	2	0
0	78	0	0	0	0	1	0	0	0	0	1	0	1	0	1	19	120	116	5.49	1.32	3.8	5.57	1.32	5.49	3.8	5.57	120	2	3	3	1
0	75	1	0	0	0	0	0	0	0	0	1	2	0	0	1	4	130	191	2.88	1.36	1.39	5.59	1.36	2.88	1.39	5.59	130	2	1	1	0
0	66	1	0	0	0	1	0	0	0	0	0	0	1	0	3	2	121	103	2.95	3.33	13.8	5.64	3.33	2.95	13.8	5.64	121	3	1	3	0
0	71	1	0	0	1	0	0	1	0	0	0	0	0	0	2	3	151	158	4.78	2.05	3.59	5.4	2.05	4.78	3.59	5.4	151	3	2	3	0
0	64	1	1	1	0	1	1	0	1	1	0	2	1	0	2	5	163	235	4.09	1.71	2.81	21.69	1.71	4.09	2.81	21.69	163	3	1	2	0
0	63	0	0	0	0	1	0	1	0	0	0	0	0	0	2	1	160	206	5.52	3.29	3.88	7.22	3.29	5.52	3.88	7.22	160	3	3	3	0
0	72	1	0	0	1	1	0	0	0	1	1	1	0	0	2	1	146	195	3.81	0.88	2.66	5.71	0.88	3.81	2.66	5.71	146	1	1	2	0
0	65	0	0	0	0	1	0	1	0	0	0	0	0	0	2	4	132	237	5.61	2.21	4.04	5.02	2.21	5.61	4.04	5.02	132	3	3	3	0
0	56	1	0	0	0	1	0	0	0	0	0	0	0	0	2	4	152	192	4.61	2.07	3.39	6.77	2.07	4.61	3.39	6.77	152	3	2	2	0
0	73	1	0	0	0	1	0	0	0	0	0	0	0	0	2	1	148	190	4.44	1.77	3.2	12.1614	1.77	4.44	3.2	8.06	148	3	2	2	0
0	60	0	0	0	0	0	0	0	0	0	0	0	0	0	1	1	132	204	4.75	1.07	3.21	8.24	1.07	4.75	3.21	8.24	132	2	2	2	0
0	82	1	0	0	0	1	0	1	0	0	1	0	1	0	1	5	105	194	5.67	1.63	4.28	12.58	1.63	5.67	4.28	12.58	105	3	3	3	0
0	64	1	0	0	0	1	0	0	0	0	0	0	0	0	2	0	142	158	5.83	3.54	2.04	9.13	3.54	5.83	2.04	9.13	142	3	3	1	0
0	51	1	1	1	0	1	1	0	0	0	0	1	1	0	2	5	95	279	3.31	1.26	2.22	11.17	1.26	3.31	2.22	11.17	95	2	1	1	0
1	81	0	0	0	0	1	1	0	0	0	1	0	0	0	1	21	141	296	4.16312	0.349325	4.11484	12.25	3.1	7.29	5.5	12.25	141	3	3	3	1
0	80	0	0	0	0	1	0	0	0	0	0	0	0	0	2	5	140	226	5.95	2.6	3.82	5.41	2.6	5.95	3.82	5.41	140	3	3	3	0
0	61	1	1	0	0	1	1	1	1	0	0	0	1	0	2	5	159	169	5.65	1.32	3.84	16.58	1.32	5.65	3.84	16.58	159	2	3	3	0
0	55	1	1	0	0	1	0	1	0	0	1	0	0	0	1	12	160	267	3.54	0.87	2.31	8.64	0.87	3.54	2.31	8.64	160	1	1	1	0
0	60	0	0	0	0	1	1	0	0	0	0	0	0	0	3	6	172	254	5.71887	3.85493	2.12596	17.06	1.61	3.74	2.26	17.06	172	3	1	1	0
0	87	0	0	0	0	1	0	0	0	0	0	0	0	0	2	26	124	192	5.18	1.87	3.27	5.71	1.87	5.18	3.27	5.71	124	3	3	2	0
0	70	1	0	0	1	0	0	1	0	0	1	1	0	1	1	6	159	210	4.55	1.17	2.88	5.75	1.17	4.55	2.88	5.75	159	2	2	2	0
0	53	1	1	0	0	1	0	0	0	0	0	0	1	0	2	2	163	177	3.87	1.35	2.44	5.95	1.35	3.87	2.44	5.95	163	2	1	1	0
0	63	1	0	0	0	0	0	0	0	0	1	0	0	0	1	10	116	166	3.69	1.22	2.46	7.61	1.22	3.69	2.46	7.61	116	2	1	1	1
0	77	1	1	0	1	1	0	0	0	0	0	0	1	0	2	2	138	310	3.05	1.29	1.43	6.24	1.29	3.05	1.43	6.24	138	2	1	1	0
0	70	1	0	0	0	1	1	1	0	1	0	0	1	0	2	1	145	211	5.42	2.28	3.58	7.93	2.28	5.42	3.58	7.93	145	3	3	3	0
0	69	1	0	1	0	1	0	1	0	0	0	0	0	0	2	3	162	124	4.26	2.05	2.25	6.63	2.05	4.26	2.25	6.63	162	3	2	1	0
0	73	1	1	1	0	1	0	0	0	0	0	0	1	0	2	5	161	122	4.63	1.43	2.88	5.51	1.43	4.63	2.88	5.51	161	2	2	2	0
0	62	1	0	0	0	0	0	0	0	0	1	0	0	0	1	8	139	210	3.79	0.67	2.23	6.85	0.67	3.79	2.23	6.85	139	1	1	1	0
0	75	1	1	0	0	1	0	1	1	1	0	1	1	0	2	3	137	318	5.08	2.68	3.11	5.28	2.68	5.08	3.11	5.28	137	3	3	2	0
0	76	1	0	0	1	0	0	1	0	0	1	0	0	1	1	10	132	175	2.14	0.57	1.05	6.3	0.57	2.14	1.05	6.3	132	1	1	1	1
0	61	0	0	0	0	1	0	0	1	0	0	0	1	0	2	5	199	102	5.54	1.79	3.36	5.5	1.79	5.54	3.36	5.5	199	3	3	2	0
1	86	1	1	0	1	1	0	0	1	0	1	0	0	0	1	11	135	195	5.15	1.08	3.17	13.39	1.08	5.15	3.17	13.39	135	2	3	2	0
0	58	1	0	0	0	0	0	0	0	0	0	0	0	0	3	1	157	291	4.12	1.17	2.34	5.06	1.17	4.12	2.34	5.06	157	2	1	1	0
0	66	1	1	0	1	1	0	0	0	0	0	0	0	0	2	8	110	197	4.64	1.47	3.13	5.7	1.47	4.64	3.13	5.7	110	2	2	2	0
0	69	0	0	0	0	1	0	0	0	0	0	0	1	0	3	0	160	248	4.82	1.45	3.41	8.37	1.45	4.82	3.41	8.37	160	2	2	2	0
1	61	0	0	0	0	0	0	0	0	0	1	0	0	0	1	11	105	146	3.76	0.77	2.46	8.57	0.77	3.76	2.46	8.57	105	1	1	1	1
0	77	1	0	0	0	1	0	0	0	0	0	0	1	0	2	5	140	292	2.41	1.13	0.86	5.89	1.13	2.41	0.86	5.89	140	2	1	1	0
0	73	1	1	0	0	1	0	0	0	1	1	1	1	0	1	5	101	187	3.37	0.92	2.17	7.26	0.92	3.37	2.17	7.26	101	1	1	1	0
0	77	1	0	0	1	1	1	0	0	0	0	0	1	0	3	3	137	256	2.56	1.39	1.47	8.82	1.39	2.56	1.47	8.82	137	2	1	1	0
0	70	0	0	0	0	1	0	0	1	0	1	1	1	0	1	3	156	231	4.84	0.91	3.48	6.37	0.91	4.84	3.48	6.37	156	1	2	3	0
0	65	0	0	0	0	0	1	1	1	0	1	0	0	0	2	17	124	230	5.52	1.48	4.04	20.82	1.48	5.52	4.04	20.82	124	2	3	3	0
0	82	1	0	0	1	1	0	0	0	0	0	0	1	0	3	7	115	920	3	0.75	1.43	6.95	0.75	3	1.43	6.95	115	1	1	1	0
0	80	1	0	0	0	1	0	0	0	0	0	0	0	0	3	1	142	121	2.77	0.69	2.77	6.08	0.69	2.77	2.77	6.08	142	1	1	2	0
0	69	1	0	0	0	1	0	1	1	0	1	0	0	0	1	6	99	182	5.44	2.53	3.56	9.2	2.53	5.44	3.56	9.2	99	3	3	3	0
0	70	1	0	0	1	0	0	1	0	0	0	0	0	0	2	7	134	156	5.08	1.14	3.58	4.94	1.14	5.08	3.58	4.94	134	2	3	3	0
0	77	1	0	0	0	1	1	1	1	1	1	1	1	1	1	1	118	238	4.66	5.16	2.87	9.2	5.16	4.66	2.87	9.2	118	3	2	2	0
0	69	1	1	0	0	1	1	1	0	0	0	0	0	0	0	1	156	161	4.44	1.03	3.53	7.75	1.03	4.44	3.53	7.75	156	2	2	3	0
0	81	0	0	0	0	1	0	0	0	0	1	0	0	0	1	11	156	154	3.99	1.44	2.78	5.52	1.44	3.99	2.78	5.52	156	2	1	2	1
1	70	1	0	0	0	1	0	0	0	0	1	0	0	0	1	14	156	177	5.81	1.11	3.67	8.85	1.11	5.81	3.67	8.85	156	2	3	3	1
0	64	1	0	0	0	0	0	1	0	0	0	0	0	0	2	7	138	224	5.77	1.21	4.24	5.49	1.21	5.77	4.24	5.49	138	2	3	3	0
1	76	1	0	0	0	1	1	0	0	0	0	0	1	0	2	2	143	179	2.43	0.6	1.18	14.15	0.6	2.43	1.18	14.15	143	1	1	1	0
0	36	1	1	0	0	1	0	1	1	0	0	0	0	0	1	3	132	251	5.71	3.83	3.45	5.78	3.83	5.71	3.45	5.78	132	3	3	3	0
0	47	1	0	0	0	0	0	0	0	0	0	0	0	0	3	0	124	235	4.84	1.35	3.29	7.19	1.35	4.84	3.29	7.19	124	2	2	2	0
0	82	1	1	0	1	1	1	0	1	1	0	0	1	0	2	7	154	194	3.46	0.87	2.53	10.89	0.87	3.46	2.53	10.89	154	1	1	1	0
0	73	1	0	0	0	1	1	1	0	0	0	0	1	0	2	4	137	171	4.12	2.38	2.28	11.18	2.38	4.12	2.28	11.18	137	3	1	1	0
0	50	1	1	0	0	1	0	1	0	0	0	0	0	0	3	1	147	334	4.72	2.03	3.61	5.62	2.03	4.72	3.61	5.62	147	3	2	3	0
0	67	1	0	0	0	1	1	0	0	0	1	0	1	0	1	12	141	127	4.36	1.53	2.67	13.46	1.53	4.36	2.67	13.46	141	2	2	2	0
0	83	1	0	0	0	1	1	1	0	0	1	0	1	0	1	16	190	113	4.43	2.11	3.02	6.82	2.11	4.43	3.02	6.82	190	3	2	2	0
0	78	0	0	0	0	1	0	0	0	0	1	0	1	0	1	1	145	194	5.60527	0.915655	2.63657	8.76	1.86	4.22	2.54	8.76	145	3	2	1	0
1	69	1	0	0	0	1	0	0	0	0	0	0	1	0	2	13	111	248	3.14	1.1	1.89	6.08	1.1	3.14	1.89	6.08	111	2	1	1	1
0	82	0	0	0	0	1	0	0	0	0	1	1	1	0	3	18	110	191	5.1	0.92	3.9	6.22	0.92	5.1	3.9	6.22	110	1	3	3	1
0	68	1	0	0	0	1	0	1	1	0	1	0	0	0	1	23	147	238	15.42	3.41	12.65	9.44	3.41	15.42	12.65	9.44	147	3	3	3	0
0	50	1	1	0	0	0	0	0	0	0	0	0	0	0	3	5	102	210	3.56	1.32	1.93	3.97	1.32	3.56	1.93	3.97	102	2	1	1	0
0	74	1	0	0	0	1	0	0	0	0	1	2	1	0	1	3	150	221	4.45	1.22	3.3	7.27	1.22	4.45	3.3	7.27	150	2	2	2	0
1	73	1	0	1	0	1	0	0	0	0	1	0	0	0	2	10	166	178	4.93	0.74	3.48	9.42	0.74	4.93	3.48	9.42	166	1	2	3	0
0	55	0	0	0	0	0	0	1	0	0	0	0	0	0	3	0	141	241	5.67	0.68	4.2	4.88	0.68	5.67	4.2	4.88	141	1	3	3	0
0	51	1	1	0	0	0	0	1	0	0	0	0	0	0	2	4	140	272	3.93	0.94	2.97	6.2	0.94	3.93	2.97	6.2	140	1	1	2	0
0	70	0	0	0	1	0	0	0	0	0	1	0	0	0	1	16	103	121	4.26	0.74	2.97	5.43	0.74	4.26	2.97	5.43	103	1	2	2	0
1	70	1	0	0	0	1	0	0	0	0	0	0	0	0	2	14	118	323	4.18	0.45	3.11	7.6	0.45	4.18	3.11	7.6	118	1	2	2	1
0	57	0	0	0	0	0	0	1	0	0	0	0	0	0	3	0	143	274	5.93	1.56	4.58	5.7	1.56	5.93	4.58	5.7	143	3	3	3	0
1	72	0	0	0	1	1	1	0	0	0	1	0	0	0	1	12	155	179	5.1	3.07	3.6	7.14	3.07	5.1	3.6	7.14	155	3	3	3	0
0	83	0	0	0	0	0	1	0	0	0	0	0	0	0	3	0	137	151	3.83	1.26	2.95	6.63	1.26	3.83	2.95	6.63	137	2	1	2	0
0	62	1	1	0	0	1	1	1	0	0	0	0	0	0	2	2	154	356	5.65	10.59	2.03	15.5	10.59	5.65	2.03	15.5	154	3	3	1	0
0	20	1	1	0	0	0	0	0	0	0	0	0	0	0	3	0	138	232	3.34	0.77	2.52	4.95	0.77	3.34	2.52	4.95	138	1	1	1	0
0	62	1	1	1	0	1	1	1	0	0	0	0	0	0	3	7	155	235	5.77	2.71	4.38	5.96	2.71	5.77	4.38	5.96	155	3	3	3	0
0	81	1	1	1	0	0	0	0	1	1	0	0	0	0	2	3	138	173	3.76	1.01	2.62	8.13	1.01	3.76	2.62	8.13	138	1	1	2	0
0	67	1	1	1	1	1	0	0	0	0	0	0	0	0	2	6	140	246	4.33	2.49	3	9.31	2.49	4.33	3	9.31	140	3	2	2	0
0	60	1	1	1	0	1	0	0	0	0	0	0	0	0	2	13	150	221	4.42	1.55	3.13	6.49	1.55	4.42	3.13	6.49	150	3	2	2	1
0	40	1	0	0	0	1	0	0	0	0	0	0	0	0	1	5	142	244	4.12	1.42	3.02	5.57	1.42	4.12	3.02	5.57	142	2	1	2	0
0	78	0	0	0	0	0	0	0	0	0	0	0	0	0	3	10	167	225	4.43	1.75	3.19	6.56	1.75	4.43	3.19	6.56	167	3	2	2	0
0	88	0	0	0	0	0	0	0	0	0	0	0	0	0	3	7	130	140	4.1	1.09	2.79	12.4897	1.09	4.1	2.79	6.57	130	2	1	2	0
0	67	1	0	1	0	1	1	0	0	0	0	0	1	0	3	4	121	176	2.48	1.21	1.49	10.7	1.21	2.48	1.49	10.7	121	2	1	1	0
0	61	1	0	0	0	1	0	0	1	0	0	0	0	0	2	10	137	217	3.78	1.33	2.75	7.9	1.33	3.78	2.75	7.9	137	2	1	2	0
0	72	0	0	0	0	1	0	0	0	0	0	0	1	0	2	7	105	190	2.22	0.32	1.05	8.62	0.32	2.22	1.05	8.62	105	1	1	1	1
0	70	1	1	0	0	0	1	0	0	0	1	0	0	0	2	5	107	225	5.56	0.65	3.33	15.2	0.65	5.56	3.33	15.2	107	1	3	2	1
1	70	1	0	0	0	0	0	0	1	0	0	0	1	0	1	5	140	131	3.95	0.87	2.98	8.84	0.87	3.95	2.98	8.84	140	1	1	2	1
0	68	1	1	1	0	0	0	0	0	0	0	0	0	0	3	2	142	102	4.62	1.37	3.2	7.97	1.37	4.62	3.2	7.97	142	2	2	2	0
0	54	1	0	0	0	0	0	1	0	0	0	0	0	0	3	3	114	217	4.97	1.03	3.77	7.29	1.03	4.97	3.77	7.29	114	2	2	3	0
0	63	1	1	1	1	0	0	0	1	0	1	0	0	0	1	4	139	188	3.46	1.15	1.95	6.05	1.15	3.46	1.95	6.05	139	2	1	1	0
0	83	1	0	0	0	1	0	1	1	1	0	1	1	1	2	18	127	313	5.27	1.09	4.09	6.05	1.09	5.27	4.09	6.05	127	2	3	3	1
0	77	1	0	0	0	1	0	0	0	0	1	2	1	0	1	4	157	215	3.78	0.97	2.73	9.95	0.97	3.78	2.73	9.95	157	1	1	2	0
0	51	1	0	0	0	1	0	1	0	0	0	0	0	0	2	1	170	211	5.05	1.27	3.71	6.74	1.27	5.05	3.71	6.74	170	2	3	3	0
0	45	0	0	0	0	0	0	0	0	0	0	0	0	0	1	5	116	252	3.91	0.82	2.5	6.25	0.82	3.91	2.5	6.25	116	1	1	1	0
1	75	1	0	0	0	1	0	0	0	0	1	0	1	0	2	15	132	237	4.79	1.03	3.4	9.04	1.03	4.79	3.4	9.04	132	2	2	2	1
0	74	1	1	0	0	0	0	1	0	0	1	0	0	0	1	6	163	126	5.09	0.78	3.74	6.81	0.78	5.09	3.74	6.81	163	1	3	3	0
0	42	0	0	0	0	1	0	0	0	0	0	0	1	0	3	7	138	218	4.79	0.78	2.59	6.31	0.78	4.79	2.59	6.31	138	1	2	2	0
1	82	1	0	0	0	1	1	0	0	1	0	1	0	1	2	15	179	135	3.17	0.9	1.92	15.71	0.9	3.17	1.92	15.71	179	1	1	1	0
0	74	1	1	0	0	0	0	0	0	0	1	0	0	0	1	19	126	167	2.11	1.12	0.92	16.645	1.12	2.11	0.92	15.9	126	2	1	1	1
0	69	1	0	0	0	1	1	0	1	0	0	0	1	0	1	4	140	176	2.69	0.76	1.23	10.14	0.76	2.69	1.23	10.14	140	1	1	1	0
0	57	1	1	0	0	1	0	1	0	0	0	0	1	0	2	13	133	322	4.53	3.2	2.66	8.4	3.2	4.53	2.66	8.4	133	3	2	2	1
0	65	0	0	0	0	1	1	1	0	0	0	0	1	0	0	3	170	273	7.9	3.16	6.03	14.4	3.16	7.9	6.03	14.4	170	3	3	3	0
0	77	1	1	0	0	0	0	0	0	0	0	0	0	0	2	7	155	232	3.81	0.79	2.67	6.77635	0.79	3.81	2.67	8.13	155	1	1	2	0
0	66	1	0	1	0	1	0	1	0	0	1	0	0	0	2	14	157	254	5.15	1.21	3.67	6.43	1.21	5.15	3.67	6.43	157	2	3	3	0
1	50	1	1	0	0	1	1	0	0	0	0	0	0	0	2	17	150	177	5.41	1.99	3.69	11.46	1.99	5.41	3.69	11.46	150	3	3	3	1
0	63	1	1	0	0	1	0	0	0	0	0	0	0	0	2	2	156	163	3.74	0.87	2.15	10.03	0.87	3.74	2.15	10.03	156	1	1	1	0
0	67	0	0	0	0	1	0	0	0	0	0	0	1	0	3	5	138	239	3.81	1.45	2.46	5.25	1.45	3.81	2.46	5.25	138	2	1	1	0
0	81	0	0	0	0	1	0	1	1	0	0	0	0	0	3	4	181	237	3.32	0.99	2.24	6.16	0.99	3.32	2.24	6.16	181	1	1	1	0
0	52	1	0	0	0	0	0	0	1	0	0	0	1	1	2	4	123	231	4.46	1.26	3.16	7.49	1.26	4.46	3.16	7.49	123	2	2	2	0
0	74	0	0	0	0	1	1	0	1	0	1	0	0	0	1	21	180	362	4.07	1.01	2.8	7.38	1.01	4.07	2.8	7.38	180	1	1	2	1
0	46	1	0	0	0	1	0	0	0	0	0	0	0	0	0	4	152	272	3.95	1.39	2.78	6.19	1.39	3.95	2.78	6.19	152	2	1	2	0
0	76	1	0	0	0	1	0	0	1	0	0	0	0	0	3	2	150	175	4.57	0.7	2.97	6.67	0.7	4.57	2.97	6.67	150	1	2	2	0
0	79	1	0	0	0	1	0	0	0	0	1	0	1	0	1	4	140	150	4.42	0.52	2.94	7.3	0.52	4.42	2.94	7.3	140	1	2	2	0
0	71	1	0	1	0	1	0	0	0	0	1	0	0	0	1	12	160	345	4.96	1.85	3.5	8.27	1.85	4.96	3.5	8.27	160	3	2	3	1
0	49	1	0	0	0	1	0	1	1	0	0	1	1	1	1	3	136	287	5.07	1.01	4.03	8.2	1.01	5.07	4.03	8.2	136	1	3	3	0
1	47	1	1	0	0	1	0	0	0	0	0	0	0	0	3	5	168	135	2.77	1.15	1.74	11.71	1.15	2.77	1.74	11.71	168	2	1	1	0
0	80	1	0	0	0	1	0	0	0	0	0	0	1	0	2	1	143	251	3.42	1.98	2.14	7.08	1.98	3.42	2.14	7.08	143	3	1	1	0
0	58	0	0	0	0	0	0	0	0	0	1	0	0	0	1	16	114	249	5.02	1.38	3.42	7.44	1.38	5.02	3.42	7.44	114	2	3	2	1
0	63	1	1	0	0	1	0	0	0	0	0	0	0	0	2	8	147	466	3.34	1.31	1.85	4.59	1.31	3.34	1.85	4.59	147	2	1	1	0
0	83	0	0	0	0	1	0	0	0	0	0	0	1	0	2	10	144	161	6.7	0.9	4.66	9.25	0.9	6.7	4.66	9.25	144	1	3	3	0
0	59	1	0	0	0	1	0	0	0	0	1	0	0	0	1	5	147	170	3.54	0.99	2.06	7.47	0.99	3.54	2.06	7.47	147	1	1	1	0
0	48	0	0	0	0	1	0	0	0	0	0	0	1	0	2	11	170	299	5.85	0.89	3.9	6.02	0.89	5.85	3.9	6.02	170	1	3	3	0
0	79	1	1	0	0	0	0	0	0	0	1	1	0	1	1	2	122	173	2.44	0.57	0.97	4.69	0.57	2.44	0.97	4.69	122	1	1	1	0
0	66	1	1	0	0	1	0	0	0	0	0	0	1	0	2	17	93	248	2.6	1.08	1.74	8.5	1.08	2.6	1.74	8.5	93	2	1	1	1
0	58	1	1	0	0	0	0	0	0	0	0	0	0	0	2	8	107	244	5.12	1.4	3.6	5.6	1.4	5.12	3.6	5.6	107	2	3	3	0
0	84	0	0	0	0	0	0	0	0	0	0	0	0	0	1	16	186	267	4.73	1.59	3.77	5.12	1.59	4.73	3.77	5.12	186	3	2	3	0
0	77	0	0	0	0	1	0	1	0	0	0	0	1	0	2	1	179	198	5.34	0.88	3.76	5.95	0.88	5.34	3.76	5.95	179	1	3	3	0
0	85	0	0	0	0	1	0	0	0	0	0	0	1	0	2	8	131	186	3.83	0.56	1.77	6.23	0.56	3.83	1.77	6.23	131	1	1	1	0
1	80	1	0	0	0	0	0	0	1	0	1	0	0	0	1	12	144	169	3.9	0.42	3.06	7.03	0.42	3.9	3.06	7.03	144	1	1	2	1
0	64	0	0	0	0	1	1	1	0	0	0	0	0	0	2	7	155	333	6.84	1.53	5.57	11.21	1.53	6.84	5.57	11.21	155	2	3	3	0
1	83	1	0	0	1	1	0	0	0	0	0	0	1	0	2	29	80	208	3.85	1.76	2.56	6.35	1.76	3.85	2.56	6.35	80	3	1	1	1
0	49	0	0	0	0	0	0	0	0	0	0	0	0	0	2	4	130	294	6	1.42	4.16	4.34	1.42	6	4.16	4.34	130	2	3	3	0
0	86	0	0	0	0	1	0	0	0	0	1	0	0	0	1	12	160	185	4.95	1.26	3.38	6.41	1.26	4.95	3.38	6.41	160	2	2	2	0
0	61	0	0	0	0	0	0	0	0	0	1	0	0	0	1	21	117	88	3.06	0.71	1.62	5.38	0.71	3.06	1.62	5.38	117	1	1	1	1
0	69	1	0	0	0	1	1	0	0	0	0	0	1	0	2	6	135	222	3.53	0.73	2.57	11.4	0.73	3.53	2.57	11.4	135	1	1	1	0
0	69	1	0	0	0	1	0	0	0	0	0	0	1	0	2	15	160	247	4.59	1.58	3.08	7.76	1.58	4.59	3.08	7.76	160	3	2	2	0
0	87	1	0	0	0	1	1	1	0	1	0	0	1	0	2	19	136	154	3.95	2.72	2.35	16.08	2.72	3.95	2.35	16.08	136	3	1	1	0
0	73	1	1	0	0	0	1	0	0	0	0	0	0	0	2	4	160	218	3.99	1.71	2.9	9.81	1.71	3.99	2.9	9.81	160	3	1	2	0
0	31	0	0	0	0	0	0	0	0	0	0	0	0	0	3	6	96	173	4.99367	1.43534	1.32432	10.11	1.37	4.79	3.85	10.11	96	2	2	3	1
0	51	1	1	0	0	1	0	1	0	0	0	0	1	0	3	2	152	407	3.95	1.93	2.22	6.08	1.93	3.95	2.22	6.08	152	3	1	1	0
0	57	1	0	1	0	1	0	1	0	0	0	0	1	0	2	4	195	330	5.36	1.3	3.86	7.01	1.3	5.36	3.86	7.01	195	2	3	3	0
0	73	0	0	0	0	0	0	1	0	0	0	0	0	0	2	3	140	174	6.43	0.83	4.26	6.77	0.83	6.43	4.26	6.77	140	1	3	3	0
0	62	1	1	0	0	0	0	1	0	0	0	0	0	0	2	1	120	201	5.43	3.35	3.4	7.85	3.35	5.43	3.4	7.85	120	3	3	2	0
0	74	1	1	0	0	1	0	0	0	0	1	0	1	0	1	2	185	113	3.61	1.38	2.2	7.88	1.38	3.61	2.2	7.88	185	2	1	1	0
0	72	0	0	0	0	1	0	0	0	1	1	0	1	0	1	3	120	204	4.81	1.12	3.45	6.74	1.12	4.81	3.45	6.74	120	2	2	3	1
0	49	0	0	0	0	0	0	0	0	0	0	0	0	0	3	10	105	291	3.34	0.74	1.83	7.20784	0.74	3.34	1.83	6.74	105	1	1	1	1
0	80	0	0	0	0	1	1	0	0	1	0	0	1	0	2	15	190	212	3.78	2.05	2.4	12.86	2.05	3.78	2.4	12.86	190	3	1	1	1
0	58	0	0	0	0	1	0	0	0	0	0	0	0	0	2	8	120	256	3.34	1.43	1.96	13.81	1.43	3.34	1.96	13.81	120	2	1	1	0
0	61	0	0	0	0	0	0	0	0	0	0	0	0	0	3	0	122	244	5.15	1.31	3.4	6.37	1.31	5.15	3.4	6.37	122	2	3	2	0
0	67	0	0	0	0	1	1	0	0	0	0	0	0	0	2	7	154	181	5.04	1.09	3.42	14.43	1.09	5.04	3.42	14.43	154	2	3	2	0
0	76	0	0	0	0	1	0	0	0	0	1	0	0	0	1	16	170	101	3.21	0.52	1.72	10.03	0.52	3.21	1.72	10.03	170	1	1	1	0
0	52	1	0	0	0	0	0	0	1	0	1	0	0	0	1	10	116	203	3.16	0.83	2.19	5.66	0.83	3.16	2.19	5.66	116	1	1	1	1
1	80	1	0	0	0	1	1	0	1	0	0	0	1	0	2	12	138	101	3.52	0.88	1.8	23.55	0.88	3.52	1.8	23.55	138	1	1	1	1
0	73	1	0	0	0	1	0	0	0	0	0	0	0	0	2	0	182	237	4.49	1.36	3.07	7.26	1.36	4.49	3.07	7.26	182	2	2	2	0
0	79	0	0	0	1	1	1	0	0	0	0	1	1	1	2	7	134	182	2.69	1.18	1.61	8.57	1.18	2.69	1.61	8.57	134	2	1	1	0
0	83	1	0	0	0	1	0	0	0	1	1	0	1	0	2	2	188	255	5.35	1	3.56	4.46	1	5.35	3.56	4.46	188	1	3	3	0
0	69	0	0	0	0	1	0	0	0	0	1	0	1	0	1	18	156	211	2.51	0.52	1.02	8.38	0.52	2.51	1.02	8.38	156	1	1	1	0
0	78	1	0	0	1	0	0	0	0	0	0	1	0	1	2	3	140	198	3.33	0.78	1.49	6.19	0.78	3.33	1.49	6.19	140	1	1	1	0
0	74	0	0	0	0	1	1	0	0	0	0	0	1	0	2	3	174	267	3.42	0.79	2.02	6.48	0.79	3.42	2.02	6.48	174	1	1	1	0
0	58	1	1	0	0	1	1	0	0	0	0	0	1	0	2	3	153	162	3.86388	1.66069	3.30204	4.93	2.04	3.49	1.87	4.93	153	3	1	1	0
0	73	1	1	0	0	1	0	0	0	0	1	0	0	0	2	5	163	220	5.09	0.97	3.51	5.89	0.97	5.09	3.51	5.89	163	1	3	3	0
1	85	0	0	0	0	1	0	0	0	1	1	1	1	0	1	16	151	183	2.38	0.96	1.14	6.96	0.96	2.38	1.14	6.96	151	1	1	1	0
0	65	1	0	0	0	1	0	0	0	0	0	0	0	0	2	24	136	262	2.92	0.47	1.72	8.07	0.47	2.92	1.72	8.07	136	1	1	1	1
0	80	1	0	0	0	0	0	0	0	1	1	0	0	0	1	9	112	84	3.18	0.57	1.88	6.04079	0.57	3.18	1.88	9.58	112	1	1	1	1
0	50	1	1	1	0	0	1	0	0	0	0	0	0	0	2	4	120	200	4.69	1.36	3.41	28.95	1.36	4.69	3.41	28.95	120	2	2	2	0
0	91	0	0	0	0	0	0	0	0	0	0	0	0	0	2	16	156	159.989	6.26	2.13	4.23	9.11178	2.13	6.26	4.23	10.44	156	3	3	3	1
0	58	1	1	1	0	0	0	0	0	0	0	0	0	0	2	15	145	253	3.21	1.3	1.45	5.07	1.3	3.21	1.45	5.07	145	2	1	1	1
0	73	1	0	0	0	1	1	0	0	0	0	0	1	0	2	7	115	253	2.49	1.6	1.02	7.23	1.6	2.49	1.02	7.23	115	3	1	1	1
0	68	1	0	0	0	1	0	0	1	1	0	0	0	0	1	12	121	207	4.59	0.78	3.25	12.02	0.78	4.59	3.25	12.02	121	1	2	2	0
0	71	1	0	0	0	1	1	0	0	0	1	0	1	0	1	19	150	139	4.7	1.25	3.3	6.05	1.25	4.7	3.3	6.05	150	2	2	2	1
0	75	1	0	0	1	1	0	0	0	0	1	0	1	0	2	13	145	236	5.4	0.88	3.86	4.58	0.88	5.4	3.86	4.58	145	1	3	3	1
0	73	1	0	0	0	1	0	0	1	1	0	0	1	0	1	27	124	279	6.04	1.47	4.68	8.95	1.47	6.04	4.68	8.95	124	2	3	3	0
0	75	1	0	0	0	1	0	0	0	0	0	0	0	0	2	13	106	209	4.94	1.08	3.45	7.78	1.08	4.94	3.45	7.78	106	2	2	3	1
0	76	1	1	0	0	1	0	0	0	0	0	0	1	0	2	5	157	235	4.29	2.23	2.54	5.4	2.23	4.29	2.54	5.4	157	3	2	1	0
0	81	0	0	0	1	1	1	0	0	0	1	0	1	0	1	33	146	150	6.24	1.46	4.76	12.53	1.46	6.24	4.76	12.53	146	2	3	3	0
0	74	1	1	0	0	1	0	0	0	0	0	0	1	0	2	13	148	174	4.34	1.32	2.75	6.54	1.32	4.34	2.75	6.54	148	2	2	2	0
0	48	1	1	0	1	1	1	1	0	0	0	0	1	0	2	3	140	155	3.73	3.47	2.13	9.91	3.47	3.73	2.13	9.91	140	3	1	1	0
0	64	1	1	1	0	1	0	0	0	0	0	0	1	0	2	15	144	226	3.72	1.36	2.5	25.45	1.36	3.72	2.5	25.45	144	2	1	1	0
0	69	0	0	0	0	1	1	0	0	0	0	0	1	1	2	10	159	254	5.03	2.44	3.36	8.53	2.44	5.03	3.36	8.53	159	3	3	2	0
0	76	1	0	0	0	1	1	0	0	0	0	0	1	0	2	6	158	292	3.86	1.01	2.59	10.35	1.01	3.86	2.59	10.35	158	1	1	2	0
0	65	0	0	0	0	1	0	0	0	0	1	2	1	0	1	3	167	187	5.19	0.97	3.14	10.26	0.97	5.19	3.14	10.26	167	1	3	2	0
0	75	1	0	0	0	0	0	0	0	0	0	0	0	0	2	2	133	206	5.27896	0.867128	0.908248	4.99	1.78	5.35	3.32	4.99	133	3	3	2	0
0	68	0	0	0	0	1	0	0	0	0	0	0	1	0	2	1	137	185	4.64	1.41	3.11	5.18	1.41	4.64	3.11	5.18	137	2	2	2	0
0	87	1	1	0	0	0	0	0	0	0	0	0	0	0	2	27	120	210	4.16	1.19	2.76	10.6011	1.19	4.16	2.76	12.2	120	2	2	2	0
0	84	1	0	0	0	1	1	0	0	0	0	0	1	0	2	19	196	84	4.12	1.59	2.89	7.16	1.59	4.12	2.89	7.16	196	3	1	2	0
0	59	0	0	0	0	1	0	0	0	0	0	0	1	0	2	1	149	271	4.29	1.45	2.83	8.08	1.45	4.29	2.83	8.08	149	2	2	2	0
0	74	1	0	0	0	0	0	0	0	0	0	0	0	0	2	1	126	116	5.5	0.98	3.87	7.99	0.98	5.5	3.87	7.99	126	1	3	3	0
0	77	0	0	0	0	1	1	0	0	0	0	0	1	0	2	9	171	220	5.81	2.17	4.24	6.99	2.17	5.81	4.24	6.99	171	3	3	3	0
0	57	1	0	0	0	0	0	0	0	0	0	0	0	1	2	5	114	262	6.07	0.96	4.65	6.18	0.96	6.07	4.65	6.18	114	1	3	3	0
0	86	0	0	0	0	1	1	0	0	0	0	0	1	0	2	4	186	280	4.61	2.66	2.7	10.64	2.66	4.61	2.7	10.64	186	3	2	2	0
0	83	0	0	0	0	1	0	0	1	0	1	2	1	1	1	2	124	198	3.82	0.78	2.15	7.06	0.78	3.82	2.15	7.06	124	1	1	1	0
0	71	1	0	0	0	1	0	0	0	0	0	0	0	0	0	1	166	191	4.24	1.3	2.88	10.62	1.3	4.24	2.88	10.62	166	2	2	2	0
1	85	1	0	0	0	1	0	0	0	0	0	0	0	0	2	15	190	191	4.79	0.63	3.18	12.62	0.63	4.79	3.18	12.62	190	1	2	2	0
0	58	1	1	1	0	1	0	0	0	0	0	0	1	0	2	2	128	263	5.25	1.88	3.76	7.72	1.88	5.25	3.76	7.72	128	3	3	3	0
0	35	1	1	0	0	0	0	0	0	0	0	0	0	0	2	14	142	184	4.23	1.38	3.17	5.61458	1.38	4.23	3.17	8.22	142	2	2	2	0
0	60	1	1	1	0	0	0	0	0	0	0	0	0	0	2	2	208	185	3.04	0.83	1.73	5.09	0.83	3.04	1.73	5.09	208	1	1	1	0
0	60	1	0	0	0	1	0	0	0	0	0	0	0	0	2	2	157	246	2.92	0.85	1.77	8.12	0.85	2.92	1.77	8.12	157	1	1	1	0
0	60	1	0	0	0	1	1	0	0	0	0	0	0	0	2	9	149	126	1.78	1.2	0.65	14.87	1.2	1.78	0.65	14.87	149	2	1	1	1
0	54	1	1	0	0	1	0	0	0	0	0	0	1	0	2	6	142	268	4.4	1.17	2.72	6.38	1.17	4.4	2.72	6.38	142	2	2	2	0
0	66	1	0	0	0	1	1	0	0	0	0	0	1	0	2	8	123	174	4	1.51	2.45	17.27	1.51	4	2.45	17.27	123	2	1	1	1
0	58	1	1	0	0	0	0	0	0	0	0	0	0	0	1	0	149	191	4.77	1.3	3.15	7.97853	1.3	4.77	3.15	7.57	149	2	2	2	0
0	69	1	1	0	1	0	0	0	0	0	0	1	0	1	2	1	160	199	4.52	1.43	3.15	5.33	1.43	4.52	3.15	5.33	160	2	2	2	0
0	60	1	1	0	0	1	0	0	0	0	0	0	1	0	2	2	111	340	5.21	0.82	3.56	9.61	0.82	5.21	3.56	9.61	111	1	3	3	0
0	63	1	1	0	1	1	1	1	0	0	1	1	0	0	2	23	140	160	6.44	0.98	4.41	11.38	0.98	6.44	4.41	11.38	140	1	3	3	0
0	58	1	1	0	0	0	0	0	0	0	0	0	0	0	2	6	135	222	3.72	0.82	2.42	5.24287	0.82	3.72	2.42	8.76	135	1	1	1	1
0	69	1	0	0	0	0	0	0	0	0	0	0	0	0	2	31	119	167	4.29	0.43	2.8	8.79	0.43	4.29	2.8	8.79	119	1	2	2	1
0	61	1	1	0	0	1	0	0	0	0	0	0	1	0	2	27	138	288	3.18	0.94	1.5	5.64	0.94	3.18	1.5	5.64	138	1	1	1	0
0	77	0	0	0	0	0	0	0	0	0	0	0	0	0	2	11	156	199	4.53	0.85	3.41	6.27	0.85	4.53	3.41	6.27	156	1	2	2	0
0	67	1	0	1	0	0	0	0	0	0	0	0	0	0	2	10	158	198	3.75	0.84	2.64	4.98	0.84	3.75	2.64	4.98	158	1	1	2	0
0	76	1	0	0	0	1	0	0	1	1	0	1	1	1	2	23	139	160	5.39079	0.64701	2.82504	6.18438	1.19	4.52	2.92	10.7	139	2	2	2	0
0	63	1	0	1	0	1	1	0	0	0	1	0	0	0	2	0	148	265	5.46	1.36	4.01	6.8	1.36	5.46	4.01	6.8	148	2	3	3	0
0	63	1	0	0	0	0	0	0	0	0	1	0	0	0	1	8	123	125	3.84	0.98	2.31	6.17	0.98	3.84	2.31	6.17	123	1	1	1	0
0	68	1	0	0	0	1	0	0	0	0	0	0	1	0	3	27	143	187	3.55	1.23	2.12	10.45	1.23	3.55	2.12	10.45	143	2	1	1	0
0	81	1	0	0	0	1	0	0	0	0	1	0	1	0	1	19	144	285	5.18	0.84	3.6	-3.72435	0.84	5.18	3.6	5.68	144	1	3	3	0
0	60	0	0	0	0	1	0	0	0	0	0	0	0	0	2	18	106	151	5.23419	4.21896	2.78859	5.97	1.55	5.55	3.11	5.97	106	3	3	2	0
1	74	1	1	0	0	0	0	0	0	0	0	0	0	0	2	34	179	98	5.88804	0.802017	3.57389	11.86	1.85	4.78	3.64	11.86	179	3	2	3	1
0	71	1	1	0	0	0	0	1	0	1	0	0	0	0	2	2	113	188	5.66	1.86	3.88	8.14649	1.86	5.66	3.88	4.46	113	3	3	3	0
0	51	0	0	0	0	1	0	0	0	0	0	0	0	0	1	12	178	286	6.06	0.7	4.32	6.68	0.7	6.06	4.32	6.68	178	1	3	3	0
0	57	1	1	1	0	1	0	0	1	0	0	0	1	0	2	2	153	128	3.21	0.58	1.97	7.69	0.58	3.21	1.97	7.69	153	1	1	1	0
0	65	0	0	0	0	0	0	0	1	0	1	0	0	0	1	3	121	257	4.89	1.17	3.59	6.44	1.17	4.89	3.59	6.44	121	2	2	3	0
0	58	1	0	0	0	1	0	0	1	0	0	0	0	0	2	18	150	159	3.19	1.45	2.19	6.07	1.45	3.19	2.19	6.07	150	2	1	1	1
0	77	0	0	0	0	0	0	0	0	0	1	0	0	1	1	17	184	259	3.83	0.8	2.53	10.19	0.8	3.83	2.53	10.19	184	1	1	1	0
1	71	0	0	0	0	1	1	0	0	0	0	0	1	0	2	28	130	150	3.75	0.82	2.5	19.58	0.82	3.75	2.5	19.58	130	1	1	1	1
0	54	1	1	0	0	0	0	0	0	0	0	0	0	0	1	14	138	88	4.19	0.67	3.03	4.63975	0.67	4.19	3.03	7	138	1	2	2	0
0	52	1	0	0	0	0	0	0	0	0	0	0	0	0	2	9	119	145	2.89	0.48	1.69	7.25091	0.48	2.89	1.69	4.69	119	1	1	1	1
0	72	1	1	0	0	1	1	0	1	0	0	0	1	0	2	5	192	122	3.87	0.94	2.55	5.62	0.94	3.87	2.55	5.62	192	1	1	1	0
0	82	1	1	1	0	0	0	0	0	0	0	0	0	0	2	5	131	196	4.43	1.13	2.83	5.51	1.13	4.43	2.83	5.51	131	2	2	2	0
0	68	1	0	0	0	1	0	0	1	0	0	0	1	0	2	11	135	278	5.3	1.78	3.36	7.28185	1.78	5.3	3.36	7.14	135	3	3	2	0
0	71	1	0	0	0	0	0	0	1	0	0	0	0	0	2	3	160	150	4.17	1.06	2.65	6.21	1.06	4.17	2.65	6.21	160	2	2	2	0
0	69	1	1	1	0	0	0	0	1	1	1	2	0	1	1	21	115	54	2.67	1.22	1.52	5.75	1.22	2.67	1.52	5.75	115	2	1	1	1
0	45	1	0	1	0	0	0	0	0	0	0	0	0	0	2	6	122	325	5.04	1.51	3.48	7.00312	1.51	5.04	3.48	9.93	122	2	3	3	1
0	49	1	1	1	0	0	1	0	0	0	0	0	0	0	2	11	167	228	3.61	1.61	2.4	11.06	1.61	3.61	2.4	11.06	167	3	1	1	0
0	62	0	0	0	0	1	1	0	0	1	1	0	0	0	1	2	147	298	3.66	0.81	2.15	12.58	0.81	3.66	2.15	12.58	147	1	1	1	0
0	73	1	0	0	0	1	0	0	0	0	1	0	0	0	1	7	152	242	3.9	0.81	2.67	6.13215	0.81	3.9	2.67	4.95	152	1	1	2	0
0	58	1	0	1	0	0	0	0	0	0	0	0	0	0	2	17	149	167	4.16	1.09	2.1	5.1	1.09	4.16	2.1	5.1	149	2	2	1	0
0	80	0	0	0	0	0	0	1	1	0	1	0	0	0	1	8	161	246	5.27	2.04	3.51	7.91675	2.04	5.27	3.51	8.23	161	3	3	3	0
0	59	0	0	0	0	1	0	0	0	0	0	0	1	0	2	17	155	222	4.4	0.9	3.15	5.22	0.9	4.4	3.15	5.22	155	1	2	2	0
0	70	1	0	0	0	0	0	0	0	0	0	0	0	0	2	5	183	210	4.06	0.88	2.53	7.99577	0.88	4.06	2.53	7.8	183	1	1	1	0
0	72	1	1	0	0	1	0	0	1	0	1	0	0	0	1	13	145	207	4.8	1.39	3.2	7.62	1.39	4.8	3.2	7.62	145	2	2	2	0
0	55	1	0	0	1	1	0	0	0	0	0	0	0	0	2	22	171	302	4.04	0.7	2.56	5.39	0.7	4.04	2.56	5.39	171	1	1	1	0
0	74	1	0	0	0	1	0	0	0	0	0	0	0	0	2	11	138	193	2.87	1.09	1.63	5.93119	1.09	2.87	1.63	5.68	138	2	1	1	0
0	58	1	1	1	0	1	0	0	0	0	0	0	1	0	2	2	138	188	4.64	1.76	2.97	9.19506	1.76	4.64	2.97	6.34	138	3	2	2	0
0	67	0	0	0	0	0	0	0	0	0	0	0	0	0	2	3	132	234	4.35476	0.620946	3.45066	6.23456	2.4	5.42	3.83	6.69	132	3	3	3	0
0	79	1	0	0	0	1	0	0	0	1	1	0	0	0	1	15	123	262	2.44	1.44	1.19	9.32	1.44	2.44	1.19	9.32	123	2	1	1	1
0	76	0	0	0	0	1	1	0	0	0	0	0	1	0	2	1	166	157	4.15	1.45	2.65	6.21	1.45	4.15	2.65	6.21	166	2	2	2	0
0	68	1	0	0	0	0	0	0	0	0	1	0	0	0	1	19	133	261	4.23	1.4	3.24	5.88907	1.4	4.23	3.24	6.82	133	2	2	2	1
0	67	1	1	0	0	0	0	0	0	0	0	0	0	0	2	12	96	166	4.94	0.43	3.47	6.00843	0.43	4.94	3.47	4.48	96	1	2	3	1
1	79	1	0	0	0	1	1	0	0	0	1	0	1	0	1	17	128	136	2.9	1.2	1.39	11.9925	1.2	2.9	1.39	11.62	128	2	1	1	1
0	45	0	0	0	0	0	0	0	0	0	0	0	0	0	2	9	131	199	4.89	0.92	3.39	6.1394	0.92	4.89	3.39	5.31	131	1	2	2	0
0	75	1	0	0	0	0	0	0	0	0	0	0	0	0	2	16	166	180	5.55173	0.958034	2.76018	5.95	1.31	5.02	3.74	8.88	166	2	3	3	0
0	53	0	0	0	0	0	0	0	0	0	0	0	0	0	2	0	144	299	3.3	0.84	2.14	11.1262	0.84	3.3	2.14	8.67	144	1	1	1	0
0	65	1	0	0	0	1	0	1	0	0	1	0	0	0	1	12	151	167	5.66	0.91	4.05	8.55905	0.91	5.66	4.05	5.74	151	1	3	3	1
0	70	1	1	0	0	0	0	1	1	0	1	0	0	0	1	13	146	153	4.75	0.79	3.62	8.37668	0.79	4.75	3.62	7.27	146	1	2	3	0
0	63	1	0	0	0	1	1	1	0	0	1	0	1	0	1	2	136	220	4.69	1.14	3.5	8.15	1.14	4.69	3.5	8.15	136	2	2	3	0
0	66	1	1	0	0	0	0	0	0	0	0	0	0	0	2	2	150	205	3.58	1.15	2.19	6.41	1.15	3.58	2.19	6.41	150	2	1	1	1
0	50	0	0	0	0	1	0	0	0	0	0	0	1	0	0	2	144	252	5.68	0.94	3.92	5.75	0.94	5.68	3.92	5.75	144	1	3	3	0
0	42	1	0	0	0	0	0	0	0	0	0	0	0	0	2	4	130	226.065	4.59	1.54	3.3	4.30638	1.54	4.59	3.3	4.73	130	2	2	2	1
0	46	1	0	0	0	1	0	0	0	0	1	0	1	1	1	18	142	180	4.25	0.76	2.61	5.49	0.76	4.25	2.61	5.49	142	1	2	2	1
0	68	1	0	0	0	1	0	0	0	0	1	0	0	0	1	15	160	160	4.16	1.37	2.65	6.43	1.37	4.16	2.65	6.43	160	2	2	2	0
1	86	0	0	0	0	0	0	0	1	0	1	2	0	0	1	18	140	154	3.72	0.73	1.59	6.12812	0.73	3.72	1.59	8.59	140	1	1	1	1
0	79	1	1	0	0	1	0	0	0	0	0	0	1	0	2	2	179	220	6.13	1.1	4.45	33.8209	1.1	6.13	4.45	4.42	179	2	3	3	0
0	78	1	0	0	0	0	1	0	0	1	0	1	0	1	2	15.7699	130	282	5.99	1.09	4.8	10.84	1.09	5.99	4.8	10.84	130	2	3	3	0
1	81	0	0	0	1	1	1	0	0	0	0	0	1	0	2	17.2275	154	261	7.1	2.25	4.73	12.831	2.25	7.1	4.73	13.39	154	3	3	3	0
0	77	0	0	0	0	1	0	0	0	0	0	0	1	0	2	7	192	209.53	7.08274	1.37481	4.79707	13.2072	2.06	5.13	3.18	9.14	192	3	3	2	0
0	43	1	0	0	0	0	0	0	0	0	0	0	0	0	2	1	130	173	3.82	0.84	2.81	6.55	0.84	3.82	2.81	6.55	130	1	1	2	0
0	74	0	0	0	0	1	0	0	0	0	1	2	1	0	1	4.20838	90	205	6.66	1.75	5.15	7.34	1.75	6.66	5.15	7.34	90	3	3	3	0
0	64	1	1	0	0	0	0	0	0	0	0	0	0	0	2	11.9698	135	195.768	4.73936	2.19473	3.49341	6.38	3.47	5.83	3.51	8.59	135	3	3	3	0
0	64	1	0	0	0	1	1	0	0	0	1	2	1	0	1	4	128	116	2.2	0.81	1.79	6.4779	0.81	2.2	1.79	9.72	128	1	1	1	0
0	75	0	0	0	0	1	0	0	0	1	0	1	1	1	2	15	154	329	3.26	1.23	2.04	7.63542	1.23	3.26	2.04	9.14	154	2	1	1	0
0	75	1	1	0	0	0	0	0	0	0	0	0	0	0	2	0	129	148	4.66	1.51	2.93	15.9724	1.51	4.66	2.93	15.59	129	2	2	2	0
0	68	0	0	0	0	1	0	0	0	1	0	1	0	1	2	9.50623	144	318	5.45	1.13	4.36	7.46	1.13	5.45	4.36	7.46	144	2	3	3	0
0	64	1	0	0	1	1	0	0	0	0	0	1	1	1	2	5	150	175.81	4.02391	1.1081	2.93645	10.8018	1.02	3.64	1.73	6.25	150	2	1	1	0
1	52	1	0	0	1	0	1	0	0	0	0	1	0	1	2	12.6352	130	229	3.79948	1.30298	2.89609	8.35102	2.17	4.11	2.2	9.95	130	3	1	1	0
0	67	1	1	1	0	1	0	0	0	0	0	0	1	0	2	1.19518	136	160	5.69	1.29	3.86	6.51	1.29	5.69	3.86	6.51	136	2	3	3	1
0	59	1	1	1	0	1	1	1	0	0	0	0	0	0	2	13	165	153	4.79	2.31	2.69	19.73	2.31	4.79	2.69	19.73	165	3	2	2	0
0	75	0	0	0	0	0	1	0	0	0	1	0	0	0	1	24	164	412	4.94	0.87	3.66	8.62	0.87	4.94	3.66	8.62	164	1	2	3	0
0	64	1	0	0	0	1	1	1	0	0	0	0	1	0	0	2	157	218	5.49	1.1	4.02	14.87	1.1	5.49	4.02	14.87	157	2	3	3	0
0	77	0	0	0	0	1	0	1	0	0	0	0	1	0	2	4	156	169	5.32	1.42	4.42	7.35	1.42	5.32	4.42	7.35	156	2	3	3	0
0	78	1	0	0	1	0	1	0	1	0	1	0	0	0	1	12	130	145	3.12	0.72	1.75	9.35	0.72	3.12	1.75	9.35	130	1	1	1	0
0	75	1	0	1	0	1	0	0	0	0	1	0	1	0	1	12	152	234	3.89	0.92	2.3	8.64	0.92	3.89	2.3	8.64	152	1	1	1	0
0	77	1	1	1	0	1	0	1	0	0	0	0	0	0	2	7	104	196	6.03	1.01	4.5	5.92	1.01	6.03	4.5	5.92	104	1	3	3	0
0	58	0	0	0	0	0	1	1	0	0	0	0	0	0	3	8	158	206	7.35	6.85	4.96	14.84	6.85	7.35	4.96	14.84	158	3	3	3	0
0	68	1	1	0	0	1	1	1	0	0	0	0	1	0	0	2	154	161	5.12	2.13	3.64	8.94	2.13	5.12	3.64	8.94	154	3	3	3	0
0	71	0	0	0	0	0	0	0	0	0	0	0	0	0	3	6	160	280	4.47	0.98	3.02	7.43	0.98	4.47	3.02	7.43	160	1	2	2	0
0	60	1	1	0	0	1	0	1	0	0	0	0	1	0	3	1	162	330	4.15	3.58	2.65	4.83	3.58	4.15	2.65	4.83	162	3	2	2	0
0	73	1	1	0	0	0	0	1	0	0	1	0	0	0	1	3	110	265	5.81	2.1	4.74	5	2.1	5.81	4.74	5	110	3	3	3	0
0	68	0	0	0	0	1	0	1	0	1	1	0	0	0	1	6	164	230	5.94	1.31	4.51	10.6	1.31	5.94	4.51	10.6	164	2	3	3	0
0	78	1	0	0	1	0	0	1	0	0	0	1	0	1	3	2	158	214	3.86	2.58	2.55	7.43	2.58	3.86	2.55	7.43	158	3	1	1	0
0	52	0	0	0	0	1	0	0	0	0	0	0	0	0	3	0	170	231	4.52	0.76	3.15	6.86	0.76	4.52	3.15	6.86	170	1	2	2	0
0	74	1	1	0	0	1	0	1	0	0	0	0	1	0	2	1	150	313	4.97	1.55	3.96	4.94	1.55	4.97	3.96	4.94	150	3	2	3	0
0	34	0	0	0	0	0	0	0	0	0	0	0	0	0	1	2	120	218	3.54	1.49	2.2	5.06	1.49	3.54	2.2	5.06	120	2	1	1	0
0	67	0	0	0	0	0	0	0	0	0	0	0	0	0	2	0	132	178.374	3.68	1.19	2.44	5.73	1.19	3.68	2.44	5.73	132	2	1	1	0
0	52	1	0	0	0	1	1	1	0	0	0	0	1	0	3	1	140	184	4.82	2.7	3.58	6.43	2.7	4.82	3.58	6.43	140	3	2	3	0
0	45	1	1	1	0	0	1	1	0	0	0	0	0	0	2	6	140	246	5.66	2.65	3.92	14.48	2.65	5.66	3.92	14.48	140	3	3	3	0
0	72	1	1	0	0	1	0	0	0	0	0	0	1	0	0	3	153	165	3.24	0.47	2.02	5.37	0.47	3.24	2.02	5.37	153	1	1	1	0
0	74	1	0	0	1	1	0	1	0	0	0	0	0	0	2	12	159	194	4.94	2.12	3.5	6.91	2.12	4.94	3.5	6.91	159	3	2	3	0
0	53	1	1	0	0	0	0	1	0	0	0	0	0	0	2	12	146	206	4.55	0.78	3.77	6.15	0.78	4.55	3.77	6.15	146	1	2	3	0
0	65	1	1	0	0	0	0	0	0	0	0	0	0	0	3	5	115	198	4.36	0.39	2.64	4.76	0.39	4.36	2.64	4.76	115	1	2	2	0
0	60	0	0	0	0	0	0	1	0	0	0	0	0	0	3	9	133	179	4.65	1.63	3.44	6.01	1.63	4.65	3.44	6.01	133	3	2	3	0
0	67	1	0	0	0	1	0	1	0	1	0	0	0	0	2	3	158	178	4.65	1.74	3.71	6.14	1.74	4.65	3.71	6.14	158	3	2	3	0
0	75	0	0	0	0	0	0	0	0	0	1	0	0	0	1	15	148	215	6.01	2.3	4.59	6.06	2.3	6.01	4.59	6.06	148	3	3	3	0
0	74	0	0	0	0	1	0	1	0	0	0	0	0	0	2	9	200	197	6.01	2.3	4.59	5.81	2.3	6.01	4.59	5.81	200	3	3	3	0
0	65	1	1	0	0	1	0	1	0	0	0	0	0	0	3	5	140	207	4.79	1.76	3.39	7.06	1.76	4.79	3.39	7.06	140	3	2	2	0
0	71	1	0	0	0	1	0	0	1	1	0	0	0	0	3	17	151	226	3.55	3.55	2.15	9.29	3.55	3.55	2.15	9.29	151	3	1	1	0
0	66	1	0	1	0	0	0	1	0	0	0	0	0	0	3	16	140	173	5.01	1.13	3.48	5.58	1.13	5.01	3.48	5.58	140	2	3	3	0
0	70	1	1	0	0	1	0	0	1	1	0	0	0	0	2	7	109	202	3.66	0.9	2.53	6.72	0.9	3.66	2.53	6.72	109	1	1	1	0
0	70	0	0	0	0	1	0	1	0	0	1	0	1	0	1	2	136	206	4.53	0.81	3.44	7.62	0.81	4.53	3.44	7.62	136	1	2	3	0
0	46	1	1	0	0	1	1	1	0	0	0	0	0	0	3	3	144	256	6.18	1.84679	5.39	18.81	2.38	6.18	5.39	18.81	144	3	3	3	0
0	72	1	1	0	0	1	0	1	0	0	0	0	0	0	2	4	143	155	3.73	3.83	1.81	7.33	3.83	3.73	1.81	7.33	143	3	1	1	0
0	63	1	1	0	0	0	0	1	0	0	0	0	0	0	2	7	157	204	4.49	1.07	3.69	6.33	1.07	4.49	3.69	6.33	157	2	2	3	0
0	73	0	0	0	0	1	1	1	0	0	0	0	0	0	2	21	180	154	5.15	1.77	4.04	6.38	1.77	5.15	4.04	6.38	180	3	3	3	0
0	55	1	0	0	0	1	0	1	0	0	0	0	0	0	3	9	187	261	4.93	1.5	4.15	5.18	1.5	4.93	4.15	5.18	187	2	2	3	0
0	67	1	1	0	1	1	0	1	0	0	0	0	1	0	3	1	155	239	4.33	1.08	3.48	6.29	1.08	4.33	3.48	6.29	155	2	2	3	0
0	70	0	0	0	0	1	0	1	0	0	0	0	0	0	3	5	204	156	4.65	0.75	3.25	5.88	0.75	4.65	3.25	5.88	204	1	2	2	0
0	82	0	0	0	1	1	0	1	0	0	0	0	0	0	3	8	169	326	4.94	0.91	3.51	6.45	0.91	4.94	3.51	6.45	169	1	2	3	0
0	70	0	0	0	0	1	0	1	0	0	0	0	1	0	3	12	145	193	4.88	0.81	3.63	6.32	0.81	4.88	3.63	6.32	145	1	2	3	0
0	60	1	0	0	0	1	0	1	0	0	0	0	0	0	3	3	110	191	5.17	3.47	3.31	15.43	3.47	5.17	3.31	15.43	110	3	3	2	0
0	68	0	0	0	0	0	0	1	0	0	0	0	0	0	1	5	120	318	4.7	1.65	3.38	5.3	1.65	4.7	3.38	5.3	120	3	2	2	0
0	72	1	0	0	0	1	0	1	0	0	0	0	1	0	3	9	150	198	4.35	1.75	3.39	6.84	1.75	4.35	3.39	6.84	150	3	2	2	0
0	54	1	1	0	0	1	0	1	0	0	0	0	1	0	3	3	190	174	4.12	2.67	2.69	5.17	2.67	4.12	2.69	5.17	190	3	1	2	0
0	68	1	0	0	0	1	0	1	0	0	0	0	1	0	3	13	155	220	4.98	0.79	3.7	11.02	0.79	4.98	3.7	11.02	155	1	3	3	0
0	70	0	0	0	0	0	0	0	1	0	1	0	0	0	1	4	145	191	3.49	1.45	2.46	9.07	1.45	3.49	2.46	9.07	145	2	1	1	0
0	58	1	1	0	1	0	0	1	0	0	0	0	0	0	2	10	133	266	3.86	2.24	2.68	7.42	2.24	3.86	2.68	7.42	133	3	1	2	0
0	79	0	0	0	1	1	0	1	1	0	1	0	0	0	1	13	166	219	5.06	1.09	3.47	9.94	1.09	5.06	3.47	9.94	166	2	3	3	0
0	74	1	0	0	1	1	1	0	0	0	0	1	1	0	3	2	173	211	3.85	1.52	2.31	7.55	1.52	3.85	2.31	7.55	173	2	1	1	0
0	54	1	1	0	0	1	0	0	0	0	0	0	0	0	2	3	176	208	4.36	1.01	3.05	6.64	1.01	4.36	3.05	6.64	176	1	2	2	0
0	63	1	0	0	0	0	0	1	0	0	0	0	0	0	1	8	120	124	3.92	1.71	2.43	9.75	1.71	3.92	2.43	9.75	120	3	1	1	0
1	63	0	0	0	0	1	0	0	0	0	0	0	0	0	3	6	128	197	3.73	1.09	2.84	6.57	1.09	3.73	2.84	6.57	128	2	1	2	0
0	60	1	0	0	0	1	0	1	0	0	0	0	0	0	2	3	195	259	6.13	2.53	5.08	5.3	2.53	6.13	5.08	5.3	195	3	3	3	0
0	70	0	0	0	0	1	1	0	1	1	1	1	1	1	2	18	180	186	3.81	3.24	2.54	12.41	3.24	3.81	2.54	12.41	180	3	1	1	0
0	60	1	0	0	0	0	1	1	0	1	0	0	0	0	3	9	140	177	4.95	1.19	3.44	21.37	1.19	4.95	3.44	21.37	140	2	2	3	0
0	50	1	0	0	0	0	0	0	0	0	0	0	0	0	3	3	150	206	4.56	1.54	3.06	7.13859	1.54	4.56	3.06	5.61	150	2	2	2	0
0	55	0	0	0	1	0	0	0	0	0	0	1	0	1	3	2	172	228	5.14	1.48	3.07	5.98	1.48	5.14	3.07	5.98	172	2	3	2	0
0	71	0	0	0	0	1	0	0	0	0	0	0	0	0	2	4	200	386	4.43	0.6	2.75	6.5	0.6	4.43	2.75	6.5	200	1	2	2	0
0	66	1	1	0	0	0	0	0	0	0	0	0	0	0	3	3	167	193	4.08	1.21	3.21	7.14	1.21	4.08	3.21	7.14	167	2	1	2	0
0	55	0	0	0	0	0	0	1	0	0	0	0	0	0	3	1	158	211	6.16	1.67	5.52	5.59206	1.67	6.16	5.52	5.69	158	3	3	3	0
0	81	1	1	1	0	0	0	0	0	0	0	0	0	0	3	2	140	145	4.4	1.09	2.26	7.25064	1.09	4.4	2.26	8.65	140	2	2	1	0
0	53	1	1	0	0	0	1	1	0	0	0	0	0	0	3	3	129	200	4.05	2.21	2.89	16.78	2.21	4.05	2.89	16.78	129	3	1	2	0
0	63	0	0	0	0	0	0	1	0	0	0	0	0	0	3	0	153	278	5.41	0.83	4.15	7.69079	0.83	5.41	4.15	5.85	153	1	3	3	0
0	76	1	0	0	0	1	1	0	0	0	0	0	1	0	2	4	158	288	3.23	0.64	1.92	13.24	0.64	3.23	1.92	13.24	158	1	1	1	0
0	61	1	0	0	0	0	1	1	0	0	0	0	0	0	2	5	117	284	4.93	1.2	4.09	9.04	1.2	4.93	4.09	9.04	117	2	2	3	0
0	69	1	0	0	0	1	0	0	0	0	0	0	0	0	3	5	157	132	4.66	0.66	2.56	6.13	0.66	4.66	2.56	6.13	157	1	2	1	0
0	60	1	1	0	0	1	0	0	0	0	0	0	0	0	2	8	220	258	2.66	6.02	0.48	6.07	6.02	2.66	0.48	6.07	220	3	1	1	0
0	53	1	1	0	0	0	0	0	0	0	0	0	0	0	3	0	138	235	4.34	1.12	3.12	1.33697	1.12	4.34	3.12	8.42	138	2	2	2	0
0	92	1	1	0	1	1	0	0	0	0	1	0	1	0	1	10	156	138	3.67	0.54	2.33	5.84	0.54	3.67	2.33	5.84	156	1	1	1	0
0	69	0	0	0	0	0	0	0	1	1	1	2	0	0	2	9	124	126	3.9	0.93	2.35	6.59	0.93	3.9	2.35	6.59	124	1	1	1	0
0	88	1	0	0	0	0	0	1	1	1	0	0	0	0	3	5	130	109	4.42	1.74	3.15	6.38	1.74	4.42	3.15	6.38	130	3	2	2	0
0	69	1	1	1	0	0	0	0	0	0	0	0	0	0	3	7	155	134	3.73	1.62	2.44	8.54	1.62	3.73	2.44	8.54	155	3	1	1	0
0	64	1	0	0	1	0	0	0	0	0	0	1	0	0	2	7	152	186	5.49	1.55	4.29	7.84	1.55	5.49	4.29	7.84	152	3	3	3	0
0	38	1	1	0	0	1	0	1	0	0	0	0	0	0	0	8	162	217	5.79	2.62	4.5	8.94	2.62	5.79	4.5	8.94	162	3	3	3	0
0	80	1	0	0	0	0	0	0	0	0	0	0	0	0	2	1	147	165	4.29	0.72	2.42	7.57	0.72	4.29	2.42	7.57	147	1	2	1	0
1	69	0	0	0	0	1	0	1	0	0	1	0	0	0	1	16	165	252	5.19	1.68	4.26	8.08	1.68	5.19	4.26	8.08	165	3	3	3	0
0	75	0	0	0	0	0	0	1	1	0	1	0	0	0	2	4	156	168	7.6	2.17	6.34	5.9	2.17	7.6	6.34	5.9	156	3	3	3	0
0	65	1	1	1	0	1	0	0	0	0	0	0	0	0	3	2	170	187	4.67	7.76	2.02	5.95	7.76	4.67	2.02	5.95	170	3	2	1	0
0	80	0	0	0	0	1	1	1	0	0	0	0	0	0	3	6	188	198	7.03	1.55	5.11	8.03	1.55	7.03	5.11	8.03	188	3	3	3	0
0	71	0	0	0	0	1	1	0	0	1	0	0	0	0	2	5	127	253	3.36	0.82	2.1	8.68208	0.82	3.36	2.1	6.19	127	1	1	1	0
1	79	1	0	1	0	1	0	0	0	0	0	0	0	0	2	13	145	424	4.16	1.07	2.71	6.46	1.07	4.16	2.71	6.46	145	2	2	2	0
0	76	1	0	0	0	1	0	0	0	0	0	0	1	0	2	8	152	229	4.21	0.61	2.88	5.3	0.61	4.21	2.88	5.3	152	1	2	2	0
0	75	1	1	0	1	1	0	1	0	0	0	0	1	0	3	1	148	227	5.49	0.79	3.26	7.39	0.79	5.49	3.26	7.39	148	1	3	2	0
0	65	0	0	0	0	1	1	1	0	0	0	0	1	0	3	4	150	233	3.82	2.37	2.22	8.7161	2.37	3.82	2.22	10.46	150	3	1	1	0
0	64	1	1	0	0	0	0	0	1	0	0	0	0	0	1	4	138	194	4.72	1.77	2.68	6.13	1.77	4.72	2.68	6.13	138	3	2	2	0
0	77	1	1	0	1	1	0	0	0	1	0	0	0	0	2	6	136	231	4.52	1.37	2.79	9.38998	1.37	4.52	2.79	9.05	136	2	2	2	0
0	43	1	0	0	0	0	0	0	0	0	0	0	0	0	3	4	155	233	5.12	2.59	3.64	7.12	2.59	5.12	3.64	7.12	155	3	3	3	0
0	61	1	0	0	0	1	0	0	0	0	1	0	1	0	1	5	120	153	4.76	0.58	3.22	8.71	0.58	4.76	3.22	8.71	120	1	2	2	0
0	56	1	0	0	0	0	0	1	0	0	0	0	0	0	2	4	163	227	5.37	3.25	4.09	8.06	3.25	5.37	4.09	8.06	163	3	3	3	0
0	86	0	0	0	0	1	0	1	0	0	0	0	0	0	2	6	214	258	5.77	0.55	4.17	5.08	0.55	5.77	4.17	5.08	214	1	3	3	0
0	57	0	0	0	0	0	0	1	0	0	0	0	0	0	3	18	161	249	8.25	1.81	6.09	7.26	1.81	8.25	6.09	7.26	161	3	3	3	0
0	73	1	0	1	0	1	1	1	0	0	0	0	1	0	3	5	132	146	3.74	2.03	2.36	8.89472	2.03	3.74	2.36	10.17	132	3	1	1	0
0	35	0	0	0	0	0	0	0	1	0	1	0	0	0	1	12	135	325	2.9	0.87	2.35	6.87	0.87	2.9	2.35	6.87	135	1	1	1	0
0	65	0	0	0	0	0	0	0	1	1	0	0	0	0	2	12	123	315	4.82	1.96	3.53	8.13	1.96	4.82	3.53	8.13	123	3	2	3	1
0	83	0	0	0	0	0	0	1	1	0	1	1	0	0	1	4	119	142	4.97	1.36	3.96	5.66	1.36	4.97	3.96	5.66	119	2	2	3	0
0	56	0	0	0	0	0	0	0	0	0	0	0	0	0	3	3	130	233	5.23053	1.18494	2.03005	6.53544	0.79	4.57	2.65	6.76	130	1	2	2	0
0	63	1	1	0	0	0	0	1	0	0	0	0	0	0	3	1	119	233	4.47	0.87	3.21	4.97	0.87	4.47	3.21	4.97	119	1	2	2	0
0	75	1	0	0	0	1	1	0	1	1	0	0	1	0	2	13	158	188	2.94	0.88	1.75	7.24339	0.88	2.94	1.75	11.01	158	1	1	1	0
0	52	0	0	0	0	1	0	0	0	0	0	0	1	0	1	5	173	269	4.28	3.56	2.26	6.34	3.56	4.28	2.26	6.34	173	3	2	1	0
0	51	1	0	0	0	1	0	0	0	0	0	0	1	0	2	5	142	186	3.12531	1.65536	3.41723	14.3063	0.6	5	2.36	9.38	142	1	3	1	0
0	50	1	1	0	0	0	0	0	0	0	0	0	0	0	3	11	151	279	4.16	1.48	2.99	8.23932	1.48	4.16	2.99	4.09	151	2	2	2	0
0	65	1	0	0	0	1	1	0	0	0	0	0	0	0	3	6	166	215	3.72	1.26	2.79	12.7183	1.26	3.72	2.79	12.06	166	2	1	2	0
0	66	0	0	0	1	0	0	1	0	0	0	0	0	0	3	13	140	244	4.83	0.92	3.23	5.44	0.92	4.83	3.23	5.44	140	1	2	2	0
0	49	1	0	0	0	1	0	0	0	0	0	0	0	0	2	7	168	237	3.42	3.21	1.83	5.34272	3.21	3.42	1.83	5.7	168	3	1	1	0
0	47	0	0	0	0	0	0	0	1	0	1	0	0	0	1	11	131	330	4.33	1.2	3.21	5.08524	1.2	4.33	3.21	8.54	131	2	2	2	0
0	80	1	0	0	1	0	0	0	0	1	0	0	0	0	1	9	153	231	3.3	1.09	1.86	12.73	1.09	3.3	1.86	12.73	153	2	1	1	0
0	67	0	0	0	0	1	0	1	0	0	0	0	0	0	3	1	183	280	4.68	1.22	3.45	6.04251	1.22	4.68	3.45	7.35	183	2	2	3	0
0	55	1	0	1	1	1	1	1	0	1	1	0	1	0	1	7	183	151	4.78	3	3.16	7.73	3	4.78	3.16	7.73	183	3	2	2	0
0	69	0	0	0	1	1	0	1	0	0	1	0	1	0	1	2	202	181	5.42	1.41	3.87	10.7904	1.41	5.42	3.87	7.97	202	2	3	3	0
1	64	1	0	0	0	0	0	0	0	0	1	0	0	0	1	1	150	181	4.13	2.02	2.89	6.6737	2.02	4.13	2.89	6.98	150	3	2	2	0
0	69	1	0	0	0	1	0	1	0	0	0	0	0	0	2	5	140	218	5.72	1.38	4.35	6.47	1.38	5.72	4.35	6.47	140	2	3	3	0
0	76	1	1	0	0	0	0	0	0	0	0	0	0	0	2	2	170	174	5.27	0.81	3.43	5.33506	0.81	5.27	3.43	5.64	170	1	3	3	0
1	79	1	1	0	1	1	0	1	0	0	1	0	0	0	1	11	130	154	5.43	1.84	4.08	5.7565	1.84	5.43	4.08	8.16	130	3	3	3	0
0	71	1	1	0	0	1	0	1	0	0	0	0	1	0	2	3	155	294	5.37	1.39	4.23	5.58741	1.39	5.37	4.23	9.49	155	2	3	3	0
0	94	1	0	0	0	1	1	0	1	0	0	0	1	0	2	6	186	195	4.12	0.66	2.76	6.84	0.66	4.12	2.76	6.84	186	1	1	2	0
0	82	0	0	0	0	0	0	0	1	0	1	0	0	0	1	21	146	161	3.01	0.7	1.55	2.18786	0.7	3.01	1.55	4	146	1	1	1	0
0	73	0	0	0	0	1	0	0	0	0	0	0	1	0	2	7	166	104	4.79	0.76	2.77	5.69	0.76	4.79	2.77	5.69	166	1	2	2	0
0	63	1	1	0	0	0	0	0	0	0	0	0	0	0	2	5	176	259	4.29	0.64	3.06	6.62	0.64	4.29	3.06	6.62	176	1	2	2	0
0	51	1	0	0	0	1	0	0	0	0	0	0	0	0	3	15	130	215	4.23	0.9	3.04	6.69393	0.9	4.23	3.04	7.4	130	1	2	2	0
0	79	0	0	0	1	1	0	1	0	0	0	0	0	0	3	15	167	203	5.61	1.19	4.47	5.39	1.19	5.61	4.47	5.39	167	2	3	3	0
0	71	0	0	0	0	1	0	0	0	0	0	0	0	0	2	13	142	258	4.63	1.21	2.78	5.93844	1.21	4.63	2.78	10.02	142	2	2	2	0
0	63	1	1	0	0	0	0	1	0	0	0	0	0	0	0	3	150	199	5.71	1.77	4.38	6.7	1.77	5.71	4.38	6.7	150	3	3	3	0
0	79	1	0	0	0	0	0	1	1	0	1	2	0	0	1	15	162	236	3.47	2.04	2.57	6.66	2.04	3.47	2.57	6.66	162	3	1	1	0
0	76	1	0	0	0	1	0	0	0	0	0	0	0	0	0	7	192	252	4.58	0.81	3.43	5.6	0.81	4.58	3.43	5.6	192	1	2	3	0
0	76	0	0	0	0	0	0	1	0	0	0	0	0	0	0	4	175	248	6.58	2.34	5.32	5.77	2.34	6.58	5.32	5.77	175	3	3	3	0
0	50	1	1	0	1	1	0	1	0	0	1	0	1	0	1	4	124	269	5.78	4.35	3.92	6.6092	4.35	5.78	3.92	6.92	124	3	3	3	0
0	86	0	0	0	0	1	0	0	0	0	0	0	0	0	3	6	154	138	4.29	0.78	2.09	2.82139	0.78	4.29	2.09	4.07	154	1	2	1	0
0	59	1	1	0	0	0	1	0	0	0	1	0	0	0	1	5	158	169	3.11	1.21	1.96	13.9117	1.21	3.11	1.96	14.41	158	2	1	1	0
0	65	0	0	0	0	0	0	0	0	0	0	0	0	0	2	5	168	280	4.58	1.42	2.85	6.14568	1.42	4.58	2.85	6.44	168	2	2	2	0
0	49	1	1	0	0	1	0	1	0	0	0	0	0	0	0	6	168	202	2.65	3.22	4.86	6.47	3.22	2.65	4.86	6.47	168	3	1	3	0
0	86	1	0	0	1	0	0	1	1	0	1	1	0	1	1	5	183	185	6.99	0.91	4.61	5.92	0.91	6.99	4.61	5.92	183	1	3	3	0
0	59	0	0	0	0	1	0	1	0	0	0	0	1	0	3	0	196	262	6.97	0.62	5.68	5.71	0.62	6.97	5.68	5.71	196	1	3	3	0
0	71	0	0	0	0	1	0	1	0	0	1	0	1	0	1	13	128	226	5.03	0.83	3.43	5.98	0.83	5.03	3.43	5.98	128	1	3	3	0
0	53	1	1	0	0	1	0	0	0	0	0	0	0	0	3	2	144	290	4.48	1.7	3.01	7.43	1.7	4.48	3.01	7.43	144	3	2	2	0
0	80	0	0	0	0	1	0	0	1	0	1	0	0	0	1	15	167	149	4.13	1.2	2.22	5.76	1.2	4.13	2.22	5.76	167	2	2	1	0
0	74	0	0	0	1	1	0	0	0	0	0	0	1	0	0	2	155	180	4.6	4.41	2.32	8.02	4.41	4.6	2.32	8.02	155	3	2	1	0
0	54	1	0	0	0	0	0	0	0	0	0	0	0	0	2	11	119	193	5.37	1.77	3.61	7.55	1.77	5.37	3.61	7.55	119	3	3	3	0
0	79	1	0	0	1	0	0	0	0	1	1	0	0	0	1	10	170	192	5.24	1.94	3.48	7.86	1.94	5.24	3.48	7.86	170	3	3	3	0
0	82	0	0	0	0	1	1	0	0	0	0	0	1	0	2	7	140	349	4.51	1.37	3.09	11.16	1.37	4.51	3.09	11.16	140	2	2	2	0
0	64	1	1	0	1	1	0	1	0	0	0	0	1	0	0	2	176	234	5.2	1.34	3.26	8.91	1.34	5.2	3.26	8.91	176	2	3	2	0
0	55	1	1	1	0	0	0	1	0	0	0	0	0	0	1	2	112	155	5.27	3.64	3.64	7.93	3.64	5.27	3.64	7.93	112	3	3	3	0
0	74	0	0	0	1	1	0	0	0	0	1	0	0	0	1	28	159	194	4.39	0.91	2.09	7.84	0.91	4.39	2.09	7.84	159	1	2	1	0
0	67	1	0	0	0	1	0	0	0	0	0	0	0	0	2	20	162	132	6.76	17.72	0.78	6.03	17.72	6.76	0.78	6.03	162	3	3	1	0
0	63	1	1	0	1	1	0	0	0	0	0	1	0	1	2	3	180	292	6.6	1.4	4.45	4.61	1.4	6.6	4.45	4.61	180	2	3	3	0
0	57	1	1	0	0	1	0	0	0	0	0	0	0	0	0	3	160	198	4.77	1.71	3.43	5.86	1.71	4.77	3.43	5.86	160	3	2	3	0
0	54	1	1	0	0	1	0	1	0	0	0	0	0	0	0	2	149	217	5.15	2.18	3.69	7.57	2.18	5.15	3.69	7.57	149	3	3	3	0
0	66	1	1	0	0	0	0	1	0	0	0	0	0	0	2	19	120	215	6.07	1.99	4.45	8.69	1.99	6.07	4.45	8.69	120	3	3	3	0
0	57	1	1	0	0	0	1	1	0	0	0	0	0	0	2	19	140	231	6.73	4.49	5	20.1	4.49	6.73	5	20.1	140	3	3	3	0
0	75	1	0	0	1	0	0	1	0	0	0	0	0	0	2	10	160	310	5.9	3.03	4.39	7.91	3.03	5.9	4.39	7.91	160	3	3	3	0
0	61	1	1	1	0	1	0	0	0	0	0	0	0	0	2	5	175	269	5.8	1.13	3.45	4.28	1.13	5.8	3.45	4.28	175	2	3	3	0
0	65	1	0	0	0	0	0	1	0	0	0	0	0	0	3	2	134	230	6.59	2.49	4.97	7.36	2.49	6.59	4.97	7.36	134	3	3	3	0
0	80	0	0	0	1	0	0	1	0	0	0	0	0	0	3	2	148	305	4.3	0.87	3.39	6.0997	0.87	4.3	3.39	6.82	148	1	2	2	0
1	66	1	0	0	0	0	0	0	0	0	0	0	0	0	2	1	122	183	4.32	0.82	2.73	6.23	0.82	4.32	2.73	6.23	122	1	2	2	0
1	89	0	0	0	1	1	0	0	0	0	1	0	1	0	1	6	198	117	3.27	1.2	1.89	7.54	1.2	3.27	1.89	7.54	198	2	1	1	0
0	52	1	1	0	0	0	0	1	0	0	0	0	0	0	2	8	160	273	6.26	1.56	4.53	6.41	1.56	6.26	4.53	6.41	160	3	3	3	0
0	70	1	0	0	0	1	0	0	0	0	0	0	0	0	0	8	154	232	3.84	1.7	2.37	6.61	1.7	3.84	2.37	6.61	154	3	1	1	0
1	62	1	1	1	0	1	0	0	0	0	0	0	0	0	2	10	122	218	4.35	1.57	2.54	5.39	1.57	4.35	2.54	5.39	122	3	2	1	1
0	49	1	1	0	0	1	0	1	0	0	0	0	0	0	3	4	147	295	4.61	4.67	2.36	7.37	4.67	4.61	2.36	7.37	147	3	2	1	0
0	66	1	1	0	0	1	0	1	0	0	0	0	1	0	3	7	104	222	5.38	1.98	3.23	7.82	1.98	5.38	3.23	7.82	104	3	3	2	0
0	62	1	1	0	0	1	0	1	1	1	0	0	1	0	2	1.50566	168	213	3.6	1.94	2.21	7.85	1.94	3.6	2.21	7.85	168	3	1	1	0
0	45	1	1	0	0	1	0	0	0	0	0	0	1	0	3	3	184	291	2.73	1.12	1.69	5.26	1.12	2.73	1.69	5.26	184	2	1	1	0
0	54	1	0	0	0	0	0	1	0	0	0	0	0	0	0	2	160	208	7.51	0.39	5.59	7.32	0.39	7.51	5.59	7.32	160	1	3	3	0
0	75	1	0	0	0	1	0	0	0	0	1	0	0	0	1	2	160	191	3.06	0.48	1.52	6.46	0.48	3.06	1.52	6.46	160	1	1	1	0
0	65	1	0	0	0	1	0	1	0	0	0	0	0	0	2	7	144	210	4.34	1.85	2.36	7.75	1.85	4.34	2.36	7.75	144	3	2	1	0
0	65	1	0	0	0	1	0	0	1	1	0	0	1	0	2	11	160	232	4.28	1.36	2.53	8.61	1.36	4.28	2.53	8.61	160	2	2	1	0
0	64	1	1	0	0	1	0	0	0	0	0	0	0	0	2	3	169	228	4.29	0.84	2.77	4.62	0.84	4.29	2.77	4.62	169	1	2	2	0
1	70	1	1	0	0	1	0	0	0	0	0	0	1	0	2	13	138	258	3.34	0.85	1.9	7.13	0.85	3.34	1.9	7.13	138	1	1	1	1
0	85	0	0	0	0	1	0	1	0	0	0	0	1	0	2	5	168	317	5.53	0.97	3.31	9.4	0.97	5.53	3.31	9.4	168	1	3	2	0
0	70	1	1	0	1	1	0	0	0	0	0	0	0	0	1	7	150	244	5.07	0.63	2.74	7.53	0.63	5.07	2.74	7.53	150	1	3	2	0
1	78	1	1	0	0	1	0	0	0	0	0	0	0	0	3	4	221	205	2.46	0.67	1	7.02	0.67	2.46	1	7.02	221	1	1	1	0
0	69	0	0	0	0	0	0	1	0	0	0	0	0	0	3	5	136	213	5.05	4.59	4.18	7.36	4.59	5.05	4.18	7.36	136	3	3	3	0
1	71	1	0	0	0	0	0	0	0	0	1	0	0	0	2	14	140	184	3.11	0.46	1.42	7.47	0.46	3.11	1.42	7.47	140	1	1	1	1
0	56	1	0	0	0	1	0	1	0	0	0	0	0	0	0	3	169	247	6.76	1.31	5.12	8.87	1.31	6.76	5.12	8.87	169	2	3	3	0
0	50	0	0	0	0	0	0	0	0	0	0	0	0	0	0	5	158	283	5.21	0.88	3.06	6.74	0.88	5.21	3.06	6.74	158	1	3	2	0
0	59	0	0	0	0	1	0	0	0	0	0	0	1	0	0	3	178	244	4.4709	0.874744	2.9831	7.45106	2.11	4.49	3.25	5.59	178	3	2	2	0
0	54	0	0	0	0	0	0	0	1	0	0	0	0	0	2	11	101	183	4.44	0.79	2.8	7.6	0.79	4.44	2.8	7.6	101	1	2	2	1
0	80	0	0	0	1	1	1	0	0	0	0	1	1	1	2	2	151	256	4.1	0.59	1.91	11.08	0.59	4.1	1.91	11.08	151	1	1	1	0
0	61	0	0	0	0	0	0	1	0	0	0	0	0	0	2	6	133	224	4.81	2.5	3.79	6.11	2.5	4.81	3.79	6.11	133	3	2	3	1
0	73	1	0	0	0	1	0	0	0	0	1	0	1	0	1	3	150	201	4.05	1.37	2.32	6.4	1.37	4.05	2.32	6.4	150	2	1	1	0
0	68	0	0	0	0	1	1	0	0	0	0	0	1	0	2	4	169	231	3.34	1.24	1.52	7.34	1.24	3.34	1.52	7.34	169	2	1	1	0
0	64	1	0	0	0	1	0	0	0	0	0	0	1	0	0	14	127	176	3.48	0.89	1.98	7.91	0.89	3.48	1.98	7.91	127	1	1	1	0
0	53	1	1	0	0	1	1	1	0	0	0	0	0	0	0	5	170	249	6.38	2.67	4.34	10.2	2.67	6.38	4.34	10.2	170	3	3	3	0
0	72	0	0	0	0	0	0	0	0	0	0	0	0	0	3	2	138	135	4.63	1.29	2.81	4.77	1.29	4.63	2.81	4.77	138	2	2	2	0
0	61	1	0	0	0	1	0	1	0	1	0	0	0	0	0	3	168	277	5.75	2.4	4.02	5.7	2.4	5.75	4.02	5.7	168	3	3	3	0
0	62	1	1	0	0	1	1	1	0	0	0	0	0	0	2	3	165	276	5.72	5.31	4.54	16.1	5.31	5.72	4.54	16.1	165	3	3	3	0
0	48	1	0	0	0	0	0	1	0	0	0	0	0	0	1	3	121	276	5.95	1.06	3.85	6.14	1.06	5.95	3.85	6.14	121	2	3	3	0
0	63	0	0	0	0	1	0	1	0	0	0	0	1	0	0	1	156	251	4.45	4.95	2.24	6.1	4.95	4.45	2.24	6.1	156	3	2	1	0
0	55	1	1	0	0	1	0	1	0	0	0	0	0	0	0	4	160	232	5.33	3.52	3.59	4.67	3.52	5.33	3.59	4.67	160	3	3	3	0
0	67	1	0	0	0	1	1	1	0	0	0	0	1	0	0	3	190	173	3.67	2.22	2.53	14.08	2.22	3.67	2.53	14.08	190	3	1	1	0
0	81	1	0	0	0	1	0	1	0	0	1	0	0	0	1	1	148	151	4.6	1.81	2.6	5.19	1.81	4.6	2.6	5.19	148	3	2	2	0
0	53	1	1	0	0	1	0	0	0	0	0	0	0	0	3	6	182	146	3.77	1.1	2.77	8.3	1.1	3.77	2.77	8.3	182	2	1	2	0
0	77	0	0	0	0	1	0	1	0	1	0	0	1	0	2	22	124	230	5.93	1.58	4.51	6.14	1.58	5.93	4.51	6.14	124	3	3	3	1
0	64	1	1	1	1	1	0	1	0	0	0	0	0	0	3	10	165	214	5.42	1.83	3.7	6.69	1.83	5.42	3.7	6.69	165	3	3	3	0
0	72	1	0	0	1	1	1	1	0	0	0	0	1	0	2	2	130	152	5.57	1.65	3.62	13.64	1.65	5.57	3.62	13.64	130	3	3	3	0
0	60	1	1	0	0	1	0	0	0	0	0	0	1	0	0	4	168	234	4.03	1.47	2.4	5.33	1.47	4.03	2.4	5.33	168	2	1	1	0
0	45	1	0	0	0	0	0	0	0	0	0	0	0	0	2	18	139	233	2.54	0.99	1.63	6.43	0.99	2.54	1.63	6.43	139	1	1	1	1
0	54	1	1	1	0	0	0	1	0	1	0	0	0	0	2	3	148	263	4.44	2.36	2.28	6.9	2.36	4.44	2.28	6.9	148	3	2	1	0
0	55	1	1	1	1	0	0	1	0	0	0	0	0	0	3	8	150	221	7.35	0.85	5.02	3.94	0.85	7.35	5.02	3.94	150	1	3	3	0
0	97	0	0	0	0	1	0	0	0	0	0	0	0	0	3	11	201	279	4.43	0.93	2.75	8.14	0.93	4.43	2.75	8.14	201	1	2	2	0
0	76	1	0	0	0	0	1	0	0	0	0	0	0	0	3	3	147	126	3.9	1.13	2.8	9.4	1.13	3.9	2.8	9.4	147	2	1	2	0
0	74	0	0	0	0	1	0	1	0	0	0	0	1	0	3	5	143	212	4.38	1.84	2.45	7.21	1.84	4.38	2.45	7.21	143	3	2	1	0
0	45	1	0	0	0	0	0	0	0	0	0	0	0	0	3	1	147	203	5.16	1.03	3.09	8.2	1.03	5.16	3.09	8.2	147	2	3	2	0
0	57	0	0	0	0	1	0	1	0	0	0	0	0	0	3	2	148	348	5.31	1.5	3.62	5.29	1.5	5.31	3.62	5.29	148	2	3	3	0
0	66	0	0	0	0	0	0	1	0	0	0	0	0	0	2	1	124	188	5.38	3.24	3.79	10.21	3.24	5.38	3.79	10.21	124	3	3	3	0
0	69	1	0	0	0	1	0	0	1	1	1	0	0	0	1	14	160	354	4.57	1.07	2.9	6.39225	1.07	4.57	2.9	8.21	160	2	2	2	1
0	57	1	1	0	1	0	0	1	0	0	0	0	0	0	2	4	122	206	4.55	0.96	3.15	4.99	0.96	4.55	3.15	4.99	122	1	2	2	0
0	54	1	1	1	1	1	1	1	0	0	0	0	0	0	3	5	169	211	4.46	2.48	2.8	11.19	2.48	4.46	2.8	11.19	169	3	2	2	0
0	84	1	1	1	0	1	1	1	0	1	0	0	0	0	2	1	166	265	4.65	2.51	2.88	10.29	2.51	4.65	2.88	10.29	166	3	2	2	0
0	65	1	1	0	0	0	0	0	0	0	0	0	0	0	2	28	134	266	4.02	1.43	2.65	7.16	1.43	4.02	2.65	7.16	134	2	1	2	1
0	65	1	1	0	0	1	0	0	0	0	0	0	0	0	3	1	164	209	3.84	0.76	2.58	4.17	0.76	3.84	2.58	4.17	164	1	1	1	0
0	69	1	0	0	1	1	0	1	0	0	0	0	0	0	3	5	140	142	2.75	1.72	1.54	7.08	1.72	2.75	1.54	7.08	140	3	1	1	0
0	70	1	1	0	1	1	0	0	0	0	0	0	1	0	3	2	165	218	4.01	0.92	2.58	7.82	0.92	4.01	2.58	7.82	165	1	1	1	0
0	67	0	0	0	0	0	0	1	0	0	0	0	0	0	3	11	150	217	5.27	1.76	3.4	10.22	1.76	5.27	3.4	10.22	150	3	3	2	0
0	72	0	0	0	0	1	0	1	0	0	0	0	0	0	0	11	158	271	5.44	1.23	3.65	8.04	1.23	5.44	3.65	8.04	158	2	3	3	0
0	53	1	1	0	0	1	0	1	0	0	0	0	0	0	0	4	181	226	3.26	1.24	3.26	5.61	1.24	3.26	3.26	5.61	181	2	1	2	0
0	55	1	1	1	0	1	0	1	0	0	0	0	1	0	0	12	139	197	4	5.8	2.27	6.82	5.8	4	2.27	6.82	139	3	1	1	0
0	54	0	0	0	0	1	0	0	0	0	0	0	0	0	0	3	181	135	4.94	1.37	2.8	5.39	1.37	4.94	2.8	5.39	181	2	2	2	0
0	66	0	0	0	0	0	0	0	0	0	0	0	0	0	3	2	122	216	4.64	0.62	2.18	5.89	0.62	4.64	2.18	5.89	122	1	2	1	0
0	49	1	1	0	0	0	0	1	1	0	0	0	0	0	1	6	123	252	5.13	1.17	3.26	6.45	1.17	5.13	3.26	6.45	123	2	3	2	0
0	66	1	1	0	0	0	0	0	1	0	0	1	0	1	3	3	159	291	4.29	0.6	2.33	8.36	0.6	4.29	2.33	8.36	159	1	2	1	0
0	70	1	0	0	0	1	1	1	0	0	0	0	0	0	3	1	162	209	4.91	2.32	3.38	11.64	2.32	4.91	3.38	11.64	162	3	2	2	0
0	77	0	0	0	1	1	0	0	0	0	1	0	1	0	1	6	128	303	3.01	0.92	1.87	7.1	0.92	3.01	1.87	7.1	128	1	1	1	0
0	74	0	0	0	0	1	0	1	0	0	0	0	0	0	2	13	172	270	5.93	2.72	5.23	8.41	2.72	5.93	5.23	8.41	172	3	3	3	0
0	56	1	1	0	1	1	0	1	0	0	0	1	1	0	1	5	150	266	7.89	1.82	5.6	9.98	1.82	7.89	5.6	9.98	150	3	3	3	0
0	58	1	1	1	0	0	0	1	0	0	0	0	0	0	2	8	133	237	5.05	3.2	3.44	7.13	3.2	5.05	3.44	7.13	133	3	3	3	0
0	57	1	1	0	0	1	0	1	0	0	0	0	1	0	2	7	163	262	6.38	1.88	4.24	9.39	1.88	6.38	4.24	9.39	163	3	3	3	1
0	53	0	0	0	0	0	0	1	0	0	1	0	0	0	1	9	138	253	6.09	4.15	4.97	7.9	4.15	6.09	4.97	7.9	138	3	3	3	0
0	78	1	0	0	1	0	0	0	0	0	1	0	0	0	2	7	150	134	3.58	0.56	1.73	4.94	0.56	3.58	1.73	4.94	150	1	1	1	0
0	68	0	0	0	0	1	0	0	0	0	1	0	1	0	2	12	172	172	5.2	1.37	3.08	6.34	1.37	5.2	3.08	6.34	172	2	3	2	1
1	58	1	1	0	0	1	1	0	0	0	1	0	1	0	1	17	141	89	2.71	0.59	1.48	16.47	0.59	2.71	1.48	16.47	141	1	1	1	0
0	71	1	1	1	0	1	0	1	0	0	0	0	0	0	2	6	183	197	4.86	2.08	3.2	6.61	2.08	4.86	3.2	6.61	183	3	2	2	0
0	64	1	0	0	0	0	0	0	0	0	1	0	0	0	2	7	144	169	4.31	0.72	3.05	3.33451	0.72	4.31	3.05	5.57	144	1	2	2	1
0	63	1	0	0	0	0	1	1	0	0	0	0	0	0	2	2	175	181	3.48	2.85	1.49	10.78	2.85	3.48	1.49	10.78	175	3	1	1	0
0	70	1	0	0	0	0	1	1	0	1	0	0	0	0	3	1	158	249	6.24	1.66	4.86	8.3	1.66	6.24	4.86	8.3	158	3	3	3	0
0	81	1	1	0	0	1	0	0	0	0	0	0	1	0	2	3	135	173	3.58	0.61	2.05	4.54	0.61	3.58	2.05	4.54	135	1	1	1	0
0	59	1	1	0	0	1	0	1	0	0	0	0	1	0	2	6	165	309	5.62	2.28	4.15	7.67	2.28	5.62	4.15	7.67	165	3	3	3	1
0	58	1	1	1	0	1	0	1	0	0	0	0	0	0	0	9	149	195	10.43	5.31	8.5	6.16	5.31	10.43	8.5	6.16	149	3	3	3	0
0	44	0	0	0	0	0	0	0	0	0	0	0	0	0	3	3	120	264	4.72	0.46	2.88	5.61	0.46	4.72	2.88	5.61	120	1	2	2	0
0	63	1	0	0	0	1	0	1	0	0	0	0	1	0	3	4	165	258	7.44	1.95	5.75	6.39	1.95	7.44	5.75	6.39	165	3	3	3	0
0	75	1	1	0	0	1	0	1	0	0	0	0	1	0	2	3	132	219	4.39	1.89	2.97	5.56	1.89	4.39	2.97	5.56	132	3	2	2	0
0	78	1	1	0	0	1	0	1	0	0	0	0	1	0	2	21	168	184	5.38	2.7	3.7	8.9	2.7	5.38	3.7	8.9	168	3	3	3	1
0	34	0	1	0	0	0	0	1	0	0	0	0	0	0	1	5	121	214	4.36	1.78	2.98	5.09	1.78	4.36	2.98	5.09	121	3	2	2	0
0	64	1	0	0	0	0	0	1	0	0	0	0	0	0	2	14	132	207	5.67	1.56	3.75	6.56	1.56	5.67	3.75	6.56	132	3	3	3	1
0	60	1	0	1	0	1	0	0	0	0	0	0	0	0	3	6	153	190	3.41	1.25	1.35	5.41	1.25	3.41	1.35	5.41	153	2	1	1	0
0	80	1	0	0	0	0	0	0	0	0	0	0	0	0	2	8	179	128	3.36	1.08	1.8	11.37	1.08	3.36	1.8	11.37	179	2	1	1	1
0	80	0	0	0	0	1	0	0	0	0	1	0	1	0	1	12	150	250	2.89	0.92	1.47	33.44	0.92	2.89	1.47	33.44	150	1	1	1	1
0	72	1	1	1	0	1	0	0	0	0	1	0	1	0	1	5	129	157	3.43	0.66	1.72	4.45	0.66	3.43	1.72	4.45	129	1	1	1	0
0	48	0	0	1	0	0	0	0	1	0	1	0	0	0	1	24	123	214	4.07	1.06	2.52	7.7	1.06	4.07	2.52	7.7	123	2	1	1	1
0	59	0	0	0	0	1	1	1	0	0	0	0	1	0	3	4	155	217	6.03	0.73	3.82	8.55	0.73	6.03	3.82	8.55	155	1	3	3	0
0	90	0	0	0	0	0	0	0	0	0	0	0	0	0	2	13	163	186	4.83	0.86	2.93	10.9	0.86	4.83	2.93	10.9	163	1	2	2	0
0	62	1	0	0	1	1	1	0	0	0	0	1	1	0	0	4	153	275	3.83	1.19	2.51	9.25	1.19	3.83	2.51	9.25	153	2	1	1	0
0	82	0	0	0	0	1	0	1	0	0	0	0	1	0	3	3	142	234	6.22	4.08	3.51	5.73	4.08	6.22	3.51	5.73	142	3	3	3	0
0	82	1	0	0	0	1	0	1	0	0	0	0	0	0	2	6	172	152	5.37	0.89	3.41	7.94	0.89	5.37	3.41	7.94	172	1	3	2	0
0	74	0	0	0	0	1	0	0	0	0	1	0	1	0	1	3	176	181	5.44	2.11	3.97	6.73	2.11	5.44	3.97	6.73	176	3	3	3	0
0	71	1	0	0	0	0	0	1	0	0	0	0	0	0	3	4	140	195	6.35	1.6	4.58	6.68	1.6	6.35	4.58	6.68	140	3	3	3	0
0	52	1	1	0	0	1	0	1	0	0	0	0	0	0	3	6	153	266	6.7	21.41	1.95	8.25	21.41	6.7	1.95	8.25	153	3	3	1	0
1	76	0	0	0	0	1	1	0	0	0	1	0	1	0	1	9	187	232	5.27	1.12	3.25	10.65	1.12	5.27	3.25	10.65	187	2	3	2	0
0	49	1	1	0	0	0	0	0	1	0	0	0	0	0	3	18	129	302	4.6	1.99	3.25	8.83	1.99	4.6	3.25	8.83	129	3	2	2	0
0	78	1	0	0	0	0	0	0	1	0	1	0	0	0	3	10	121	176	5.16	0.82	2.84	5.82	0.82	5.16	2.84	5.82	121	1	3	2	0
0	69	1	1	0	0	1	0	0	0	0	0	0	1	0	3	16	158	404	3.77	0.77	2.84	5.4213	0.77	3.77	2.84	8.76	158	1	1	2	0
0	86	0	0	0	0	1	0	0	0	0	0	0	0	0	0	3	175	197	5.85	1.48	4.17	6.26	1.48	5.85	4.17	6.26	175	2	3	3	0
0	72	0	0	0	0	1	0	1	0	0	1	0	1	1	3	16	154	179	2.47	0.81	1.57	10.0739	0.81	2.47	1.57	7.76	154	1	1	1	1
0	46	0	0	0	0	0	0	0	0	0	0	1	0	0	3	1	120	141	3.63	0.43	1.93	6.82773	0.43	3.63	1.93	4.94	120	1	1	1	0
0	90	0	0	0	0	1	0	0	0	1	1	1	1	1	3	11	155	143	3	1.67	2.13	6.87	1.67	3	2.13	6.87	155	3	1	1	0
0	50	1	0	1	0	0	0	0	0	0	0	0	0	0	3	11	158	356	2.77	1.33	1.77	8.84987	1.33	2.77	1.77	11.09	158	2	1	1	1
0	74	1	1	0	1	1	1	0	0	0	0	0	0	0	3	6	170	223	5.49	3.09	4.43	11.61	3.09	5.49	4.43	11.61	170	3	3	3	0
0	60	1	0	0	1	1	1	0	0	0	0	1	1	1	2	4	180	222	3.53	0.89	2.56	16.6472	0.89	3.53	2.56	11.66	180	1	1	1	0
0	57	0	0	0	0	0	0	0	0	0	1	0	0	0	3	13	133	299	5.39	0.79	4.24	5.74	0.79	5.39	4.24	5.74	133	1	3	3	0
0	74	1	1	0	0	1	1	0	0	0	0	0	0	0	3	12	199	341	4.19	0.52	2.15	23.44	0.52	4.19	2.15	23.44	199	1	2	1	0
0	45	1	0	0	1	0	0	0	0	0	0	1	0	1	3	3	120	186	2.9	0.85	1.84	4.01862	0.85	2.9	1.84	6.08	120	1	1	1	0
0	79	1	0	0	1	1	0	1	0	0	0	0	0	0	2	5	173	180	4.96	1.49	4.13	6.43	1.49	4.96	4.13	6.43	173	2	2	3	0
0	49	1	0	0	1	1	0	1	0	0	0	1	1	1	3	4	162	178	4.27	2.33	3.13	5.84	2.33	4.27	3.13	5.84	162	3	2	2	0
0	76	1	0	0	1	1	0	0	0	0	0	0	0	0	0	7	175	194	4.19	0.82	2.63	8.72749	0.82	4.19	2.63	6.86	175	1	2	2	0
0	78	0	0	0	0	0	0	0	1	0	1	0	0	0	3	18	133	166	2.67	0.96	1.4	6.92	0.96	2.67	1.4	6.92	133	1	1	1	0
0	56	0	0	0	0	1	0	0	1	0	1	0	0	0	2	14	146	359.604	3.82	1.28	2.32	6.29	1.28	3.82	2.32	6.29	146	2	1	1	0
0	82	1	0	0	1	1	0	0	0	0	0	1	1	0	0	5	157	201	3.81	0.78	2.53	8.1	0.78	3.81	2.53	8.1	157	1	1	1	0
0	81	0	0	0	1	1	0	0	0	0	1	0	0	0	3	25	146	207	3.73	1.01	2.37	8.48	1.01	3.73	2.37	8.48	146	1	1	1	0
0	71	1	0	1	0	1	0	0	0	0	0	0	0	0	2	4	148	304	3.7	0.8	2.56	4.45	0.8	3.7	2.56	4.45	148	1	1	1	0
0	70	1	0	0	1	1	0	0	0	0	0	1	1	1	3	14	145	411	3.18	0.45	1.22	7.22	0.45	3.18	1.22	7.22	145	1	1	1	0
0	39	1	0	0	0	1	0	0	0	0	0	0	0	0	1	4	134	160	5.61	2.13	3.66	5.44	2.13	5.61	3.66	5.44	134	3	3	3	0
0	80	1	1	0	0	0	0	1	0	1	0	1	0	1	3	17	147	189	5.49	1.13	4.53	8.24	1.13	5.49	4.53	8.24	147	2	3	3	0
0	80	1	1	0	0	1	0	0	0	0	0	0	0	0	0	8	124	294	3.96	0.8	2.23	7.41	0.8	3.96	2.23	7.41	124	1	1	1	0
0	68	1	1	1	1	0	0	0	0	0	0	0	0	0	2	12	117	159	3.46	0.9	2.01	5.9	0.9	3.46	2.01	5.9	117	1	1	1	0
0	80	1	1	0	0	0	0	1	0	0	0	0	0	0	2	20	176	201	2.51	0.66	0.89	18.93	0.66	2.51	0.89	18.93	176	1	1	1	0
0	76	0	0	0	0	1	1	0	1	1	1	0	0	0	3	8	157	203	3.59	1.99	2.05	10.18	1.99	3.59	2.05	10.18	157	3	1	1	0
0	87	0	0	0	0	1	0	0	0	0	1	1	1	1	3	20	133	162	3.13	0.66	1.36	8.37	0.66	3.13	1.36	8.37	133	1	1	1	1
0	75	0	0	0	0	1	0	0	0	0	0	0	0	0	3	2	162	154	5.27	0.6	3.18	6.49	0.6	5.27	3.18	6.49	162	1	3	2	0
0	55	1	0	0	0	0	0	0	0	0	0	0	0	0	3	16	124	156	4.26	1.23	2.95	5.82	1.23	4.26	2.95	5.82	124	2	2	2	1
0	51	0	0	0	0	1	0	0	0	0	0	0	1	0	3	21	189	330	5.51	1.76	4.22	5.76	1.76	5.51	4.22	5.76	189	3	3	3	1
0	65	1	1	0	1	1	0	1	0	0	0	0	0	0	3	2	150	166	5.21	1.07	3.72	5.79	1.07	5.21	3.72	5.79	150	2	3	3	0
0	82	0	0	0	0	1	0	0	0	0	1	0	0	0	3	14	146	282	4.75	0.68	2.69	8	0.68	4.75	2.69	8	146	1	2	2	0
0	64	1	0	0	0	0	1	0	0	0	1	0	0	0	3	31	149	242	2.33	0.66	1.08	8.65	0.66	2.33	1.08	8.65	149	1	1	1	0
0	73	1	0	0	0	1	0	1	0	0	0	0	0	0	0	2	162	304	4.79	1.3	3.34	10.1	1.3	4.79	3.34	10.1	162	2	2	2	0
0	61	0	0	0	0	1	0	0	0	0	0	0	0	0	0	3	186	298	4.37	2.15	2.6	5.69	2.15	4.37	2.6	5.69	186	3	2	2	0
0	84	1	0	0	0	1	0	0	1	0	1	0	0	0	3	10	159	169	4.47	0.85	2.87	5.25	0.85	4.47	2.87	5.25	159	1	2	2	1
0	72	1	0	0	0	1	0	1	0	0	0	0	0	0	3	5	156	309	3.84	3.23	1.65	5.93	3.23	3.84	1.65	5.93	156	3	1	1	0
0	83	1	0	0	0	1	0	1	0	0	0	0	0	0	3	25	168	176	6.11	1.29	4.25	10.19	1.29	6.11	4.25	10.19	168	2	3	3	0
0	74	1	0	0	0	1	0	0	0	0	0	0	0	0	3	10	194	202	4.78	1.31	2.93	6.07	1.31	4.78	2.93	6.07	194	2	2	2	0
0	76	0	0	0	0	1	0	0	0	0	1	0	1	0	3	8	141	239	5.94	0.92	3.97	11.2292	0.92	5.94	3.97	6.84	141	1	3	3	0
0	82	1	1	0	0	0	0	0	0	0	0	0	0	0	3	7	146	192	4.59	1.42	2.7	6.4	1.42	4.59	2.7	6.4	146	2	2	2	0
0	65	1	0	0	0	1	0	0	0	0	0	0	1	0	3	13	131	164	5.43	1.26	3.77	7.7	1.26	5.43	3.77	7.7	131	2	3	3	0
0	60	0	0	0	0	0	0	0	0	0	1	0	0	0	3	15	160	208	4.83	1.22	3.4	5.26	1.22	4.83	3.4	5.26	160	2	2	2	0
0	82	0	0	0	0	0	0	0	0	0	1	0	0	0	3	20	169	150	5.54	0.85	3.54	7.9	0.85	5.54	3.54	7.9	169	1	3	3	0
0	80	0	0	0	0	1	0	0	0	1	1	1	1	1	3	19	150	240	5.49	1.41	3.44	6.6	1.41	5.49	3.44	6.6	150	2	3	3	0
0	69	0	0	0	0	1	0	0	0	0	0	0	1	0	3	1	167	296	5.45	2.29	3.12	6.99	2.29	5.45	3.12	6.99	167	3	3	2	0
0	68	0	0	0	0	1	0	0	0	0	1	0	0	0	3	14	185	199	4.51	1.56	2.79	5.14	1.56	4.51	2.79	5.14	185	3	2	2	1
0	75	0	0	0	0	1	0	0	1	1	1	0	1	0	3	18	179	201	4.78	1.43	2.96	6.83	1.43	4.78	2.96	6.83	179	2	2	2	0
0	56	1	0	0	0	1	1	0	0	0	0	0	1	0	3	4	191	196	4.39	1.49	3.02	11.8	1.49	4.39	3.02	11.8	191	2	2	2	0
0	73	1	1	0	0	0	1	0	0	0	1	0	0	0	3	15	158	127	3.99	1.6	2.66	18.97	1.6	3.99	2.66	18.97	158	3	1	2	0
0	82	0	0	0	0	1	1	0	1	1	1	1	1	1	3	23	173	242	3.21	0.93	1.65	8.44	0.93	3.21	1.65	8.44	173	1	1	1	1
0	58	1	1	1	0	0	1	0	0	0	0	0	0	0	3	22	149	192	3.89	1.57	2.22	13.7	1.57	3.89	2.22	13.7	149	3	1	1	1
0	60	1	1	0	0	1	0	0	0	0	0	0	0	0	3	5	158	190	6.72	5.65	4.32	8.31	5.65	6.72	4.32	8.31	158	3	3	3	0
0	74	0	0	0	1	1	0	0	1	1	1	0	1	0	3	16	153	267	4.94	5.73	2.43	5.65	5.73	4.94	2.43	5.65	153	3	2	1	0
0	90	0	0	0	0	1	0	0	1	0	1	0	0	0	3	5	207	252	4.67	0.58	3.04	6.58	0.58	4.67	3.04	6.58	207	1	2	2	0
0	61	0	0	0	0	1	0	0	0	1	1	0	1	0	3	2	162	227	3.56	0.77	2.09	6.37	0.77	3.56	2.09	6.37	162	1	1	1	0
0	62	1	0	0	0	0	0	0	0	0	0	0	0	0	3	5	170	220	6.2	2.53	4.4	12.3	2.53	6.2	4.4	12.3	170	3	3	3	0
0	82	1	0	0	0	0	0	0	1	1	1	0	0	1	3	4	149	184	4.3	1.27	2.65	6.28	1.27	4.3	2.65	6.28	149	2	2	2	0
0	77	1	0	0	0	0	0	0	1	0	1	2	0	0	3	13	128	186	4.7	1.02	3.12	7.02	1.02	4.7	3.12	7.02	128	2	2	2	0
0	80	1	0	0	1	1	0	0	0	0	0	1	1	1	3	2	177	187	3.44	1.42	1.85	7.63	1.42	3.44	1.85	7.63	177	2	1	1	0
0	71	1	1	0	0	0	0	0	0	0	0	0	0	0	3	4	206	325	5.39	3.39	4.51	10.86	3.39	5.39	4.51	10.86	206	3	3	3	0
0	68	0	0	0	0	1	0	0	1	0	1	0	1	0	3	26	147	168	2.36	1.13	0.98	9.58	1.13	2.36	0.98	9.58	147	2	1	1	0
0	72	0	0	0	0	1	0	0	0	1	1	1	1	1	2	16	172	179	3.69	3.2	1.66	5.95	3.2	3.69	1.66	5.95	172	3	1	1	0
0	56	0	0	0	0	0	0	0	0	0	1	1	0	0	3	20	132	264	3.46495	0.114839	3.59744	6.62244	1.1	5.14	2.79	7.67	132	2	3	2	1
0	76	0	0	0	0	1	0	0	0	0	1	1	0	0	3	20	190	223	4.28456	1.78846	3.91487	6.89	2.78	5.59	4.58	6.89	190	3	3	3	0
0	61	1	1	0	0	1	1	0	0	0	0	0	1	0	0	1	133	298	5.11	3.04	4.08	10.38	3.04	5.11	4.08	10.38	133	3	3	3	0
0	55	1	0	0	0	1	0	0	0	0	0	0	1	0	3	3	163	311	5.52	0.62	3.19	6.24	0.62	5.52	3.19	6.24	163	1	3	2	0
0	65	1	1	0	0	1	1	0	0	0	0	0	0	0	3	5	197	313	3.58	0.51	1.13	10.85	0.51	3.58	1.13	10.85	197	1	1	1	0
0	49	1	0	0	1	1	0	1	0	0	0	0	0	0	3	24	151	417	5.78	2.25	4	16.27	2.25	5.78	4	16.27	151	3	3	3	0
0	70	1	1	1	0	1	1	0	0	0	0	0	1	0	0	7	196	243	2.43	0.89	0.83	11.09	0.89	2.43	0.83	11.09	196	1	1	1	0
0	86	0	0	0	0	1	0	1	0	0	0	0	0	0	0	6	160	185	5.57	4.29	3.55	7.55	4.29	5.57	3.55	7.55	160	3	3	3	0
0	70	1	0	0	0	1	0	0	0	0	0	0	1	0	1	8	145	130	4.64	1.91	2.97	7.67	1.91	4.64	2.97	7.67	145	3	2	2	0
0	82	1	0	0	1	1	1	0	0	0	1	1	0	1	3	10	164	141	2.5	0.84	1.49	6.29	0.84	2.5	1.49	6.29	164	1	1	1	0
0	79	0	0	0	0	1	0	0	0	0	0	0	1	0	1	10	245	149	6.72	4.22	4.91	6.47	4.22	6.72	4.91	6.47	245	3	3	3	0
0	51	1	0	0	0	1	0	0	0	0	0	0	1	0	1	11	213	225	4.88	5.74	2.71	7.11	5.74	4.88	2.71	7.11	213	3	2	2	0
0	73	0	0	0	0	1	1	0	0	1	1	0	0	0	3	21	128	218	5.47	1.2	3.47	7.27	1.2	5.47	3.47	7.27	128	2	3	3	0
0	83	0	0	0	0	0	0	0	0	0	1	0	0	0	3	21	149	166	3.46	0.48	1.85	8.09	0.48	3.46	1.85	8.09	149	1	1	1	0
0	82	1	0	0	1	0	1	0	0	0	0	0	0	0	3	4	137	147	4.81	2.36	3.24	12.86	2.36	4.81	3.24	12.86	137	3	2	2	0
0	70	1	1	0	0	0	0	0	0	0	0	0	0	0	3	21	174	164	5.61	1.93	4.3	4.74	1.93	5.61	4.3	4.74	174	3	3	3	1
0	73	1	0	0	0	1	0	0	0	0	0	0	1	0	3	11	164	265	6.35	2.32	4.7	6.82	2.32	6.35	4.7	6.82	164	3	3	3	1
0	63	1	0	0	0	0	1	0	0	1	0	1	0	1	3	2	123	193	2.89	0.55	1.01	12.99	0.55	2.89	1.01	12.99	123	1	1	1	0
0	70	1	1	0	0	1	1	0	0	0	0	0	1	0	3	6	172	236	5.38	1.19	3.69	20.04	1.19	5.38	3.69	20.04	172	2	3	3	0
0	72	0	0	0	1	0	0	0	0	0	1	1	0	1	3	22	114	187	3.94	1.36	2.11	7.94	1.36	3.94	2.11	7.94	114	2	1	1	1
0	55	0	0	0	0	1	1	0	0	0	0	0	1	0	3	14	177	322	4.99	2.51	3.47	19.16	2.51	4.99	3.47	19.16	177	3	3	3	1
0	54	1	1	0	0	1	0	0	0	0	0	0	0	0	3	3	144	240	5.55	0.61	3.71	6.5	0.61	5.55	3.71	6.5	144	1	3	3	0
0	74	1	1	0	0	1	1	0	0	0	1	0	1	0	3	1	154	193	4.9	1.08	3.25	12.1	1.08	4.9	3.25	12.1	154	2	2	2	0
0	91	0	0	0	1	1	0	1	0	0	1	1	1	1	3	7	180	205	5.05	2.21	4.22	5.51	2.21	5.05	4.22	5.51	180	3	3	3	0
0	86	1	0	0	0	1	0	0	0	0	0	0	0	0	3	23	192	153	4.2	1.3	2.53	5.16	1.3	4.2	2.53	5.16	192	2	2	1	0
0	58	0	0	0	0	0	0	0	0	0	1	0	0	0	3	16	133	187	4.87	1.56	3.74	6.23	1.56	4.87	3.74	6.23	133	3	2	3	1
0	69	0	0	0	0	1	0	0	0	0	0	0	1	0	0	7	153	253	5.25	1.02	3.11	7.78	1.02	5.25	3.11	7.78	153	2	3	2	0
0	71	1	0	0	1	1	0	0	0	#NULL!	0	0	0	0	3	13	184	251	4.22	1.11	2.9	6.54	1.11	4.22	2.9	6.54	184	2	2	2	0
0	51	1	1	0	0	1	1	1	0	0	0	0	1	0	3	11	176	175	3.92	4.53	2.74	16.86	4.53	3.92	2.74	16.86	176	3	1	2	1
0	82	1	1	0	1	0	0	0	0	1	1	0	0	1	3	21	171	192	3.5	2.33	1.88	5.85	2.33	3.5	1.88	5.85	171	3	1	1	1
0	64	1	1	1	1	1	1	0	0	0	0	0	1	0	3	14	127	237	4.8	4.31	4.21	10.1	4.31	4.8	4.21	10.1	127	3	2	3	1
0	61	1	0	0	0	1	0	0	0	0	0	0	0	0	3	25	159	185	4.48	1.44	2.73	5.52	1.44	4.48	2.73	5.52	159	2	2	2	1
0	72	0	0	0	1	0	0	0	0	0	1	1	0	1	3	24	175	191	3.32	0.93	1.68	7.54	0.93	3.32	1.68	7.54	175	1	1	1	1
0	76	0	0	0	0	1	0	0	0	0	0	0	0	0	3	12	194	260	5.06	3.69	3.16	8.28	3.69	5.06	3.16	8.28	194	3	3	2	1
0	50	0	0	0	0	1	0	1	0	0	0	0	1	0	0	5	164	316	5.07	2.19	3.53	6.1	2.19	5.07	3.53	6.1	164	3	3	3	0
0	64	0	0	0	0	1	0	0	0	0	0	2	1	0	3	7	147	215	5.15	0.83	3.2	7.44	0.83	5.15	3.2	7.44	147	1	3	2	0
0	63	1	0	0	1	1	1	0	0	1	0	1	1	1	3	3	128	294	4.9604	1.20706	2.64726	5.77912	2.45	3.57	2.24	13.67	128	3	1	1	0
0	68	1	0	0	0	0	0	0	0	0	0	0	0	0	3	24	149	216	4.94	0.8	2.76	8.1	0.8	4.94	2.76	8.1	149	1	2	2	0
0	60	1	0	0	0	1	1	0	0	0	0	0	1	0	3	12	133	263	3.36	1.3	2.25	16.6	1.3	3.36	2.25	16.6	133	2	1	1	0
0	88	1	0	0	0	0	1	0	0	0	0	0	1	0	0	11	152	115	5.39	1.82	3.59	6.1	1.82	5.39	3.59	6.1	152	3	3	3	0
0	70	1	0	0	0	1	0	0	0	0	1	0	1	0	3	4	149	183	5.77	3.09	3.66	8.07	3.09	5.77	3.66	8.07	149	3	3	3	0
0	75	1	0	0	0	1	0	0	0	1	0	0	1	0	3	11	185	195	4.11	1.06	2.31	6.71	1.06	4.11	2.31	6.71	185	2	1	1	1
0	82	0	0	0	1	1	0	0	0	0	1	0	1	0	3	21	176	223	5.02	0.87	2.81	9.15	0.87	5.02	2.81	9.15	176	1	3	2	1
0	26	1	1	0	0	0	0	0	0	0	0	0	0	0	2	16	177	368	4.44	5.08	2.74	10.38	5.08	4.44	2.74	10.38	177	3	2	2	1
0	73	0	0	0	1	1	1	1	0	0	0	1	1	1	3	24	169	184	4.63	1.48	2.95	22.3	1.48	4.63	2.95	22.3	169	2	2	2	1
0	70	1	0	0	0	1	0	0	0	0	0	0	1	0	3	11	130	283	5.47	1.47	3.56	8.46	1.47	5.47	3.56	8.46	130	2	3	3	1
0	75	1	0	0	0	0	1	0	1	1	1	0	0	0	3	6	138	173	3.94	1.24	2.28	6.57	1.24	3.94	2.28	6.57	138	2	1	1	1
0	80	0	0	0	0	0	0	0	0	0	1	0	0	0	3	22	157	140	5.23	0.96	2.77	6.94	0.96	5.23	2.77	6.94	157	1	3	2	1
0	82	0	0	0	0	0	0	0	0	0	1	1	0	0	3	15	156	178	3.56	0.59	1.85	7.02	0.59	3.56	1.85	7.02	156	1	1	1	1
0	70	0	0	0	0	0	1	1	0	0	0	0	0	0	0	2	167	200	5.5	0.62	3.57	10.25	0.62	5.5	3.57	10.25	167	1	3	3	0
0	57	1	0	0	1	1	0	1	0	0	0	0	0	0	2	8	168	199	3.79	1.24	2.35	5.24	1.24	3.79	2.35	5.24	168	2	1	1	0
0	78	0	0	0	0	1	0	0	1	1	0	1	0	1	3	17	124	172	4.28	1.09	2.53	6.42	1.09	4.28	2.53	6.42	124	2	2	1	1
0	70	1	0	0	1	1	0	0	0	0	0	1	1	1	0	4	148	125	2.01	1.37	1.13	5.47	1.37	2.01	1.13	5.47	148	2	1	1	0
0	73	1	0	0	0	1	1	1	0	0	0	0	1	0	3	4	135	268	4.88	1.07	2.91	10.62	1.07	4.88	2.91	10.62	135	2	2	2	0
0	62	0	0	0	0	1	0	1	0	0	0	0	0	0	3	11	171	217	6.03	0.87	3.89	6.48	0.87	6.03	3.89	6.48	171	1	3	3	0
0	74	1	0	0	0	1	0	0	0	1	0	1	0	1	3	6	160	217	3.1	0.59	1.81	7.97	0.59	3.1	1.81	7.97	160	1	1	1	0
0	54	0	0	0	0	1	0	1	0	0	0	0	0	0	0	3	180	249	6.88	4.01	4.5	6.59	4.01	6.88	4.5	6.59	180	3	3	3	0
0	81	0	0	0	0	0	1	0	0	0	1	0	0	0	3	15	163	248	7.86	2.61	5.04	6.92	2.61	7.86	5.04	6.92	163	3	3	3	0
0	81	1	1	0	1	1	0	0	0	0	0	1	1	1	1	8	177	138.849	4.89	4.12	2.94	5.36	4.12	4.89	2.94	5.36	177	3	2	2	0
0	88	1	1	0	0	1	1	0	0	0	0	0	#NULL!	#NULL!	0	8	159	152	5.04425	1.24	3.50149	9.19	1.24	4.03	1.95	9.19	159	2	1	1	0
0	72	1	1	0	0	0	0	0	1	0	1	0	#NULL!	#NULL!	1	9	155	158	3.24368	0.5	2.00685	5.3	0.5	4.67	3.25	5.3	155	1	2	2	0
0	70	1	1	1	0	0	0	1	0	0	1	0	#NULL!	#NULL!	1	11	125	126	3.84354	2.6	3.54058	6.5	2.6	5.7	4.23	6.5	125	3	3	3	0
0	68	1	1	1	0	1	1	0	0	0	0	0	#NULL!	#NULL!	0	4	160	293	7.62775	1.39	3.18905	16.69	1.39	5.82	4.37	16.69	160	2	3	3	0
0	84	0	0	0	1	1	0	1	0	0	0	2	#NULL!	#NULL!	0	12	172	203	4.97107	0.81	3.49996	5.51	0.81	4.56	3.38	5.51	172	1	2	2	0
0	60	1	0	1	0	1	0	1	0	0	0	0	#NULL!	#NULL!	2	3	199	202	5.70019	4.51	2.25408	4.91	4.51	5.22	3.86	4.91	199	3	3	3	0
0	72	1	1	1	0	0	0	0	1	0	0	0	#NULL!	#NULL!	2	10	122	250	4.28722	0.76	5.68383	7.35	0.76	4.66	3.92	7.35	122	1	2	3	0
0	70	1	0	0	0	0	0	0	1	1	0	0	#NULL!	#NULL!	2	2	124	139	4.83982	3.6	2.72455	6.65	3.6	5.35	3.96	6.65	124	3	3	3	0
0	61	0	0	0	0	1	1	1	0	0	0	0	#NULL!	#NULL!	2	12	157	191	3.61784	2.59	3.20439	10.35	2.59	5.29	3.95	10.35	157	3	3	3	0
0	59	0	0	1	0	1	0	1	0	0	0	2	#NULL!	#NULL!	2	1	145	290	4.04236	0.84	3.59229	8	0.84	4.98	4.12	8	145	1	3	3	0
0	69	1	0	0	0	0	0	0	1	0	1	0	#NULL!	#NULL!	1	6	113	153	5.101	1.02	1.3658	7.13	1.02	4.75	3.79	7.13	113	2	2	3	0
0	78	1	1	0	0	0	0	0	0	0	0	0	#NULL!	#NULL!	2	4	141	215	4.93419	1.21	4.4682	4.91	1.21	4.67	2.93	4.91	141	2	2	2	0
0	72	1	1	1	0	0	0	0	0	0	0	0	#NULL!	#NULL!	2	10	151	138	5.22764	0.89	3.19505	6.72	0.89	3.36	2.07	6.72	151	1	1	1	0
0	76	0	0	0	0	1	0	1	0	0	0	1	#NULL!	#NULL!	2	4	175	199	6.25515	1.48	2.53104	4.84	1.48	4.8	2.43	4.84	175	2	2	1	0
0	73	1	1	0	0	0	0	1	0	0	0	0	#NULL!	#NULL!	0	10	145	192	3.61957	2.34	3.11814	8.36	2.34	5.26	3.05	8.36	145	3	3	2	0
0	84	0	0	0	0	1	1	0	0	1	1	0	#NULL!	#NULL!	1	10	161	193	5.77553	0.88	2.83103	5	0.88	4.32	2.49	5	161	1	2	1	0
0	58	1	0	0	0	1	0	0	0	0	0	0	#NULL!	#NULL!	2	4	138	228	5.29179	0.71	1.1414	8.24	0.71	4.89	4.44	8.24	138	1	2	3	0
0	74	1	1	1	0	1	0	0	0	0	0	1	#NULL!	#NULL!	0	11	169	150	5.46384	1.69	2.3041	6.36	1.69	4.05	2.13	6.36	169	3	1	1	0
0	91	1	0	0	0	1	0	0	0	0	1	0	#NULL!	#NULL!	1	12	163	142	3.24338	1.72	3.1778	6.08	1.72	4.7	3.35	6.08	163	3	2	2	0
0	67	1	1	1	0	1	0	1	0	0	0	0	#NULL!	#NULL!	2	11	155	271	9.91174	2.34	4.73296	7.8	2.34	3.7	2.61	7.8	155	3	1	2	0
0	66	1	1	1	0	1	1	0	1	1	1	0	#NULL!	#NULL!	3	10	162	178	4.43605	1.44	2.91046	4.57	1.44	4.91	3.17	4.57	162	2	2	2	0
0	55	1	1	1	0	1	0	0	0	0	0	0	#NULL!	#NULL!	2	11	143	219	4.4072	1.86	4.22024	6.54	1.86	4.59	3.26	6.54	143	3	2	2	0
0	81	1	0	0	0	0	0	1	1	0	1	0	#NULL!	#NULL!	1	17	138	209	5.22938	1.29	2.93592	7.25	1.29	4.6	2.79	7.25	138	2	2	2	0
0	82	0	1	1	1	1	0	0	1	1	1	0	#NULL!	#NULL!	1	10	93	186	3.87223	0.66	1.83814	7.19	0.66	4.94	3.22	7.19	93	1	2	2	0
0	71	1	0	1	0	1	0	0	0	0	0	0	#NULL!	#NULL!	2	5	145	255	5.05903	1.39	3.30535	7.02	1.39	5.5	3.75	7.02	145	2	3	3	0
0	50	1	0	0	0	0	0	0	0	0	0	0	#NULL!	#NULL!	0	3	133	91	5.11798	1.46	2.604	5.11	1.46	4.44	2.51	5.11	133	2	2	1	0
0	54	1	1	1	1	1	0	1	0	0	0	0	#NULL!	#NULL!	2	18	176	194	6.03246	1.86	2.52886	8.17	1.86	3.98	2.47	8.17	176	3	1	1	0
0	55	1	1	0	0	0	0	0	1	0	1	0	#NULL!	#NULL!	1	4	139	131	3.27036	1.37	3.66184	5.34	1.37	4.61	2.96	5.34	139	2	2	2	0
0	66	0	0	0	0	1	0	0	0	0	1	0	#NULL!	#NULL!	1	9	154	164	4.14118	2.42	2.76962	6.18	2.42	4.84	2.85	6.18	154	3	2	2	0
0	63	0	0	0	1	0	0	0	0	0	0	0	#NULL!	#NULL!	2	7	114	177	3.45955	0.52	1.50764	6.84	0.52	4.32	3.26	6.84	114	1	2	2	0
0	45	0	0	1	0	1	0	1	0	0	0	0	#NULL!	#NULL!	0	6	156	255	2.92965	1.48	2.86186	5.8	1.48	5.07	3.46	5.8	156	2	3	3	0
0	69	0	0	0	0	1	0	1	1	0	1	0	#NULL!	#NULL!	1	12	157	220	4.892	1.03	3.25389	7.84	1.03	3.97	2.77	7.84	157	2	1	2	0
0	52	1	0	0	0	0	1	0	0	0	0	0	#NULL!	#NULL!	0	5	125	305	4.9704	2.83	3.62339	6.21	2.83	6.25	4.3	6.21	125	3	3	3	0
0	64	1	1	0	0	1	0	1	0	0	0	1	#NULL!	#NULL!	2	1	169	223	4.40231	1.26	1.98391	8.49	1.26	5.19	2.97	8.49	169	2	3	2	0
0	48	0	0	0	0	1	1	1	0	0	0	0	#NULL!	#NULL!	2	5	139	182	4.68974	1.51	5.14326	13.55	1.51	4.12	2.34	13.55	139	2	1	1	0
0	48	0	0	0	0	0	0	0	0	0	0	0	#NULL!	#NULL!	2	13	127	237	4.19421	0.48	2.21851	6.55	0.48	4.87	3.31	6.55	127	1	2	2	0
0	71	0	0	0	0	1	1	0	1	0	1	0	#NULL!	#NULL!	1	3	149	256	2.71213	0.62	1.69408	6.61	0.62	5.91	4.29	6.61	149	1	3	3	0
0	67	1	1	1	0	1	0	1	0	0	0	1	#NULL!	#NULL!	2	6	138	203	5.24612	1.36	-0.48846	6.41	1.36	5.14	3.54	6.41	138	2	3	3	0
0	88	0	0	0	0	1	0	0	0	0	0	0	#NULL!	#NULL!	2	8	209	526	4.06339	1.28	4.88951	7.27	1.28	4.07	2.44	7.27	209	2	1	1	0
0	48	1	0	0	0	1	0	0	0	0	0	0	#NULL!	#NULL!	2	10	160	154	4.52248	1.12	1.24612	6.64	1.12	3.98	2.73	6.64	160	2	1	2	0
0	61	1	1	0	0	0	0	1	1	0	0	0	#NULL!	#NULL!	2	7	164	189	4.98668	1.94	1.61596	5.9	1.94	4.7	4.02	5.9	164	3	2	3	0
0	60	0	0	0	0	1	1	1	0	0	0	0	#NULL!	#NULL!	2	11	152	162	4.33372	5.33	3.11601	22.61	5.33	4.64	2.83	22.61	152	3	2	2	0
0	64	1	1	1	0	0	0	1	0	0	1	1	#NULL!	#NULL!	1	11	129	205	3.6306	2.3	2.73394	6.86	2.3	5.16	3.76	6.86	129	3	3	3	0
0	72	0	0	0	0	1	0	1	0	0	0	0	#NULL!	#NULL!	2	4	165	213	3.19923	1.47	4.08907	7.53	1.47	4.74	2.74	7.53	165	2	2	2	0
0	73	0	0	0	0	1	1	0	1	1	0	1	#NULL!	#NULL!	2	16	135	230	3.20492	0.8	2.58177	7	0.8	4	2.35	7	135	1	1	1	0
0	59	1	1	1	0	0	0	1	0	0	1	1	#NULL!	#NULL!	1	5	146	289	4.59802	5.56	2.5685	6.36	5.56	5.7	2.9	6.36	146	3	3	2	0
0	65	1	1	1	0	1	0	1	1	0	1	1	#NULL!	#NULL!	1	12	128	334	3.30254	1.9	2.90361	8.08	1.9	5.15	3.66	8.08	128	3	3	3	0
0	62	1	1	1	0	0	0	1	0	0	0	0	#NULL!	#NULL!	2	9	138	241	4.9862	1.49	2.79124	10.81	1.49	5.24	4.61	10.81	138	2	3	3	0
1	69	1	0	0	0	0	0	1	0	0	0	0	#NULL!	#NULL!	0	4	154	333	3.64088	0.49	1.91496	8.19	0.49	5.55	4.01	8.19	154	1	3	3	0
0	71	1	0	0	1	1	1	0	0	0	1	0	#NULL!	#NULL!	1	18	169	156	3.52611	0.34	1.6577	16.59	0.34	4.1	2.17	16.59	169	1	1	1	0
0	54	0	0	0	0	1	1	1	0	0	0	0	#NULL!	#NULL!	0	3	179	284	5.80686	1.68	2.6061	19.96	1.68	3.82	3.28	19.96	179	3	1	2	0
0	65	1	1	1	1	1	0	1	0	0	0	0	#NULL!	#NULL!	0	4	176	281	5.30799	2.8	3.92935	5.2	2.8	6.09	4.63	5.2	176	3	3	3	0
0	66	1	0	0	0	0	1	0	0	0	1	0	#NULL!	#NULL!	1	4	144	228	4.64971	1.39	3.27307	15.43	1.39	5.35	4.14	15.43	144	2	3	3	0
0	60	1	0	0	0	0	0	0	0	0	0	0	#NULL!	#NULL!	2	15	125	396	5.27651	0.84	2.41048	8.6	0.84	4.81	2.79	8.6	125	1	2	2	0
0	75	0	0	0	0	1	0	1	1	0	1	0	#NULL!	#NULL!	1	19	173	222	7.7626	2.15	3.30939	5.4	2.15	4.81	3.03	5.4	173	3	2	2	0
0	53	1	1	1	0	1	0	0	0	1	0	0	#NULL!	#NULL!	2	4	176	309	4.86467	0.8	4.09368	6.32	0.8	5.38	4.26	6.32	176	1	3	3	0
0	42	1	0	1	0	1	1	1	0	0	0	0	#NULL!	#NULL!	2	8	185	287	5.59932	4.25	3.66072	21.33	4.25	4.9	2.59	21.33	185	3	2	2	0
0	55	0	0	0	0	1	0	0	1	0	1	1	#NULL!	#NULL!	1	14	153	278	4.59848	2.09	3.34745	7.83	2.09	5.23	3.31	7.83	153	3	3	2	0
0	56	1	0	0	0	1	1	1	0	0	0	0	#NULL!	#NULL!	3	5	154	194	6.26586	3.69	3.68504	11.08	3.69	4.82	3.45	11.08	154	3	2	3	0
0	64	1	1	1	0	1	1	1	0	1	0	0	#NULL!	#NULL!	2	8	131	259	4.02326	8.21	4.2638	4.99	8.21	4.84	2.88	4.99	131	3	2	2	0
0	63	1	1	0	0	1	1	1	0	0	1	0	#NULL!	#NULL!	1	7	149	205	4.63309	1.86	1.97021	13.69	1.86	4.33	2.96	13.69	149	3	2	2	0
0	47	1	1	1	0	1	0	1	0	0	0	0	#NULL!	#NULL!	2	4	147	414	4.683	1.28	2.13124	7.03	1.28	4.48	3.09	7.03	147	2	2	2	0
0	62	1	1	1	0	0	0	1	0	0	0	1	#NULL!	#NULL!	2	16	158	192	6.53971	3.95	4.00315	5.73	3.95	6.13	3.64	5.73	158	3	3	3	0
0	62	1	1	0	0	1	0	1	0	0	0	0	#NULL!	#NULL!	2	9	158	294	4.95696	3.04	4.06097	7.93	3.04	4.8	2.53	7.93	158	3	2	1	0
0	29	1	1	1	0	1	1	0	0	0	0	1	#NULL!	#NULL!	0	6	159	262	5.09339	2.24	2.86823	10.31	2.24	4.94	3.38	10.31	159	3	2	2	0
0	68	1	0	0	0	1	0	0	0	0	0	0	#NULL!	#NULL!	2	3	180	291	3.78707	1.46	3.92595	5.63	1.46	4.42	3.07	5.63	180	2	2	2	0
0	64	1	1	1	1	0	1	1	0	0	0	2	#NULL!	#NULL!	0	3	141	251	3.41739	3.19	3.64747	6.14	3.19	5.41	3.6	6.14	141	3	3	3	0
0	67	0	0	0	0	1	0	1	0	0	0	0	#NULL!	#NULL!	0	3	157	312	3.69068	3.12	3.23919	6.07	3.12	4.56	2.43	6.07	157	3	2	1	0
0	74	0	0	0	0	1	0	0	0	0	1	1	#NULL!	#NULL!	1	2	155	243	4.87807	1.9	2.75898	6.83	1.9	3.96	1.86	6.83	155	3	1	1	0
0	88	0	0	1	1	0	0	1	0	0	0	0	#NULL!	#NULL!	0	8	125	291	3.75579	1.16	3.04555	5.05	1.16	4.49	3.02	5.05	125	2	2	2	0
0	74	0	0	0	0	0	1	1	0	1	0	0	#NULL!	#NULL!	0	4	133	264	4.52804	2.62	4.64713	16.84	2.62	5.54	4.03	16.84	133	3	3	3	0
0	67	1	1	0	0	0	0	1	0	0	0	0	#NULL!	#NULL!	0	4	115	195	4.18186	0.86	2.62282	7.71	0.86	4.65	2.1	7.71	115	1	2	1	0
0	64	1	1	0	0	0	0	1	0	0	0	2	#NULL!	#NULL!	0	4	118	232	5.1627	1.01	2.99488	6.72	1.01	4.4	2.83	6.72	118	1	2	2	0
0	66	0	0	0	0	1	1	0	0	0	0	0	#NULL!	#NULL!	0	4	136	216	4.64867	1.2	1.77551	6.33	1.2	3.62	2.91	6.33	136	2	1	2	0
0	69	1	1	0	0	0	0	0	0	1	1	2	#NULL!	#NULL!	1	9	119	253	4.22945	1.23	5.287	6.61	1.23	4.2	2.24	6.61	119	2	2	1	0
0	67	1	1	1	0	1	1	0	0	0	1	0	#NULL!	#NULL!	1	23	135	205	4.18188	2.86	3.20853	14.21	2.86	5.24	4.14	14.21	135	3	3	3	0
0	66	0	0	0	0	0	0	0	0	0	0	0	#NULL!	#NULL!	2	11	129	196	3.37267	1.97	4.08234	7.39	1.97	4.78	2.72	7.39	129	3	2	2	0
0	69	0	0	0	0	0	0	1	0	0	0	0	#NULL!	#NULL!	0	11	150	343	7.12	1.64	1.29906	8.61	1.64	4.2	4.12	8.61	150	3	2	3	0
0	41	1	1	1	0	1	0	1	0	0	0	1	#NULL!	#NULL!	2	6	186	207	5.55361	1.16	3.05498	8.77	1.16	4.22	2.43	8.77	186	2	2	1	0
0	85	0	0	0	0	1	0	0	0	0	1	0	#NULL!	#NULL!	1	12	172	136	3.29396	0.55	3.73924	7.35	0.55	5.19	2.58	7.35	172	1	3	1	0
0	64	1	1	0	0	0	0	0	1	1	0	1	#NULL!	#NULL!	1	12	168	149	4.10868	0.7	3.25588	4.76	0.7	4.7	3.15	4.76	168	1	2	2	0
0	69	1	1	0	0	1	1	1	0	1	0	0	#NULL!	#NULL!	3	6	163	339.926	5.53621	4.29	2.7922	6.12	4.29	5.42	4.2	6.12	163	3	3	3	0
0	70	1	1	0	0	1	0	0	0	0	0	0	#NULL!	#NULL!	2	9	157	271	5.08554	1	2.0944	5.4	1	4.08	2.72	5.4	157	1	1	2	0
0	55	1	1	1	0	1	0	1	0	0	0	0	#NULL!	#NULL!	0	6	147	183	6.12979	1.33	2.99536	8.31	1.33	4.58	2.95	8.31	147	2	2	2	0
0	59	1	1	0	0	0	0	0	0	0	0	0	#NULL!	#NULL!	2	4	118	189	3.49046	0.82	4.40965	6.67	0.82	4.2	2.8	6.67	118	1	2	2	0
0	54	1	1	0	0	0	0	1	0	0	0	0	#NULL!	#NULL!	0	4	131	182	3.29363	1.37	4.48227	5.17	1.37	5.45	3.68	5.17	131	2	3	3	0
0	35	0	0	0	1	0	0	1	0	0	0	0	#NULL!	#NULL!	3	8	118	125	3.61073	0.87	2.18096	6.45	0.87	4.32	2.55	6.45	118	1	2	1	0
0	56	1	1	1	0	1	0	1	0	0	0	0	#NULL!	#NULL!	2	4	143	209	7.26446	9	5.13234	6.42	9	6.11	2.59	6.42	143	3	3	2	0
0	83	1	1	1	0	0	0	0	0	0	1	0	#NULL!	#NULL!	1	24	160	220	5.01692	0.97	2.93826	6.07	0.97	5.71	3.22	6.07	160	1	3	2	0
0	85	0	0	0	1	1	0	0	0	0	1	1	#NULL!	#NULL!	1	7	155	186	4.8185	1.29	2.13529	5.19	1.29	4.99	3.02	5.19	155	2	3	2	0
0	71	0	0	0	0	1	0	1	0	0	1	0	#NULL!	#NULL!	1	23	146	180	7.4697	1.8	3.55801	7.46	1.8	4.87	2.96	7.46	146	3	2	2	0
0	52	1	1	0	0	1	0	1	0	0	0	0	#NULL!	#NULL!	0	2	170	324	4.63894	2.17	6.52653	5.95	2.17	4.84	3.26	5.95	170	3	2	2	0
0	56	1	1	0	0	1	0	1	0	0	0	1	#NULL!	#NULL!	2	3	160	207	5.23131	1.85	3.65313	6.84	1.85	4.61	3.14	6.84	160	3	2	2	0
0	77	1	1	1	0	0	0	1	0	0	0	0	#NULL!	#NULL!	2	7	156	250	4.18709	4.8	3.46002	8.5	4.8	5.45	2.98	8.5	156	3	3	2	0
0	56	1	1	1	0	1	0	1	0	0	0	0	#NULL!	#NULL!	0	4	154	232	4.46702	1.89	2.90642	6.2	1.89	6.22	4.39	6.2	154	3	3	3	0
0	74	0	0	0	0	1	0	0	0	1	1	0	#NULL!	#NULL!	1	15	170	161	4.20682	1.92	3.8457	6.71	1.92	4.47	3.13	6.71	170	3	2	2	0
0	71	0	0	1	0	1	0	0	0	0	1	1	#NULL!	#NULL!	1	12	175	197	5.07388	0.92	3.5878	6.64	0.92	4.69	3.61	6.64	175	1	2	3	0
0	61	0	0	0	0	0	0	0	0	0	1	1	#NULL!	#NULL!	1	10	130	191	3.67443	1.44	3.47217	6.58	1.44	4.31	2.74	6.58	130	2	2	2	0
